# Supplementary material for: Comparative analysis of full-length mitochondrial genomes of five Skeletonema species reveals conserved genome organization and recent speciation
Source: PubMed Central journal article supplement (PMC8520197; doi:10.1186/s12864-021-07999-z), 2021-10-15

**A (I)**

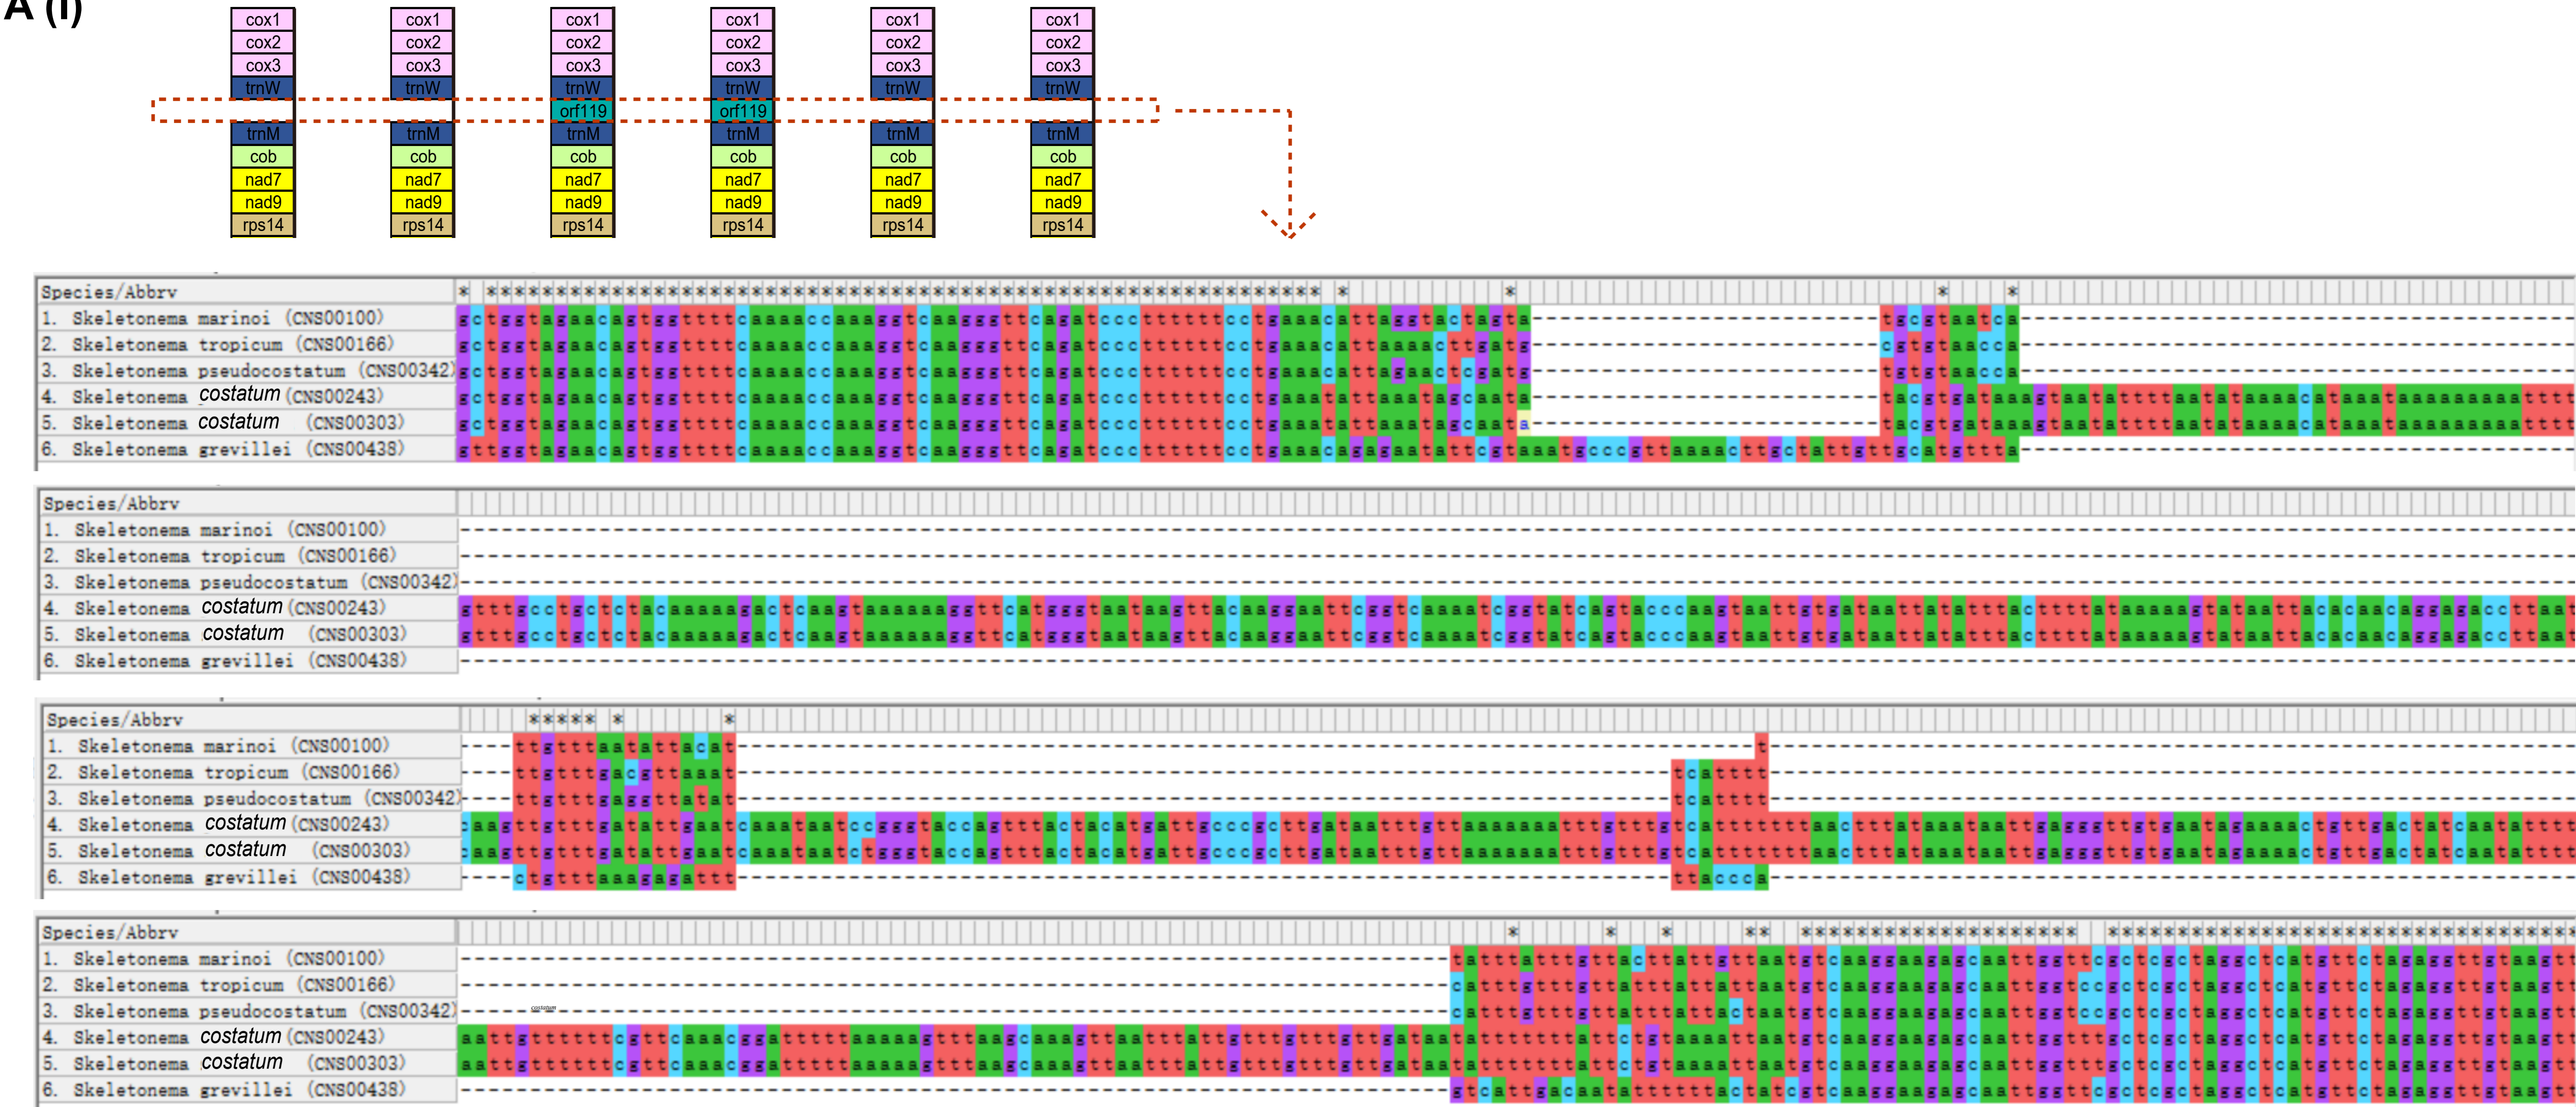

**B (II)**

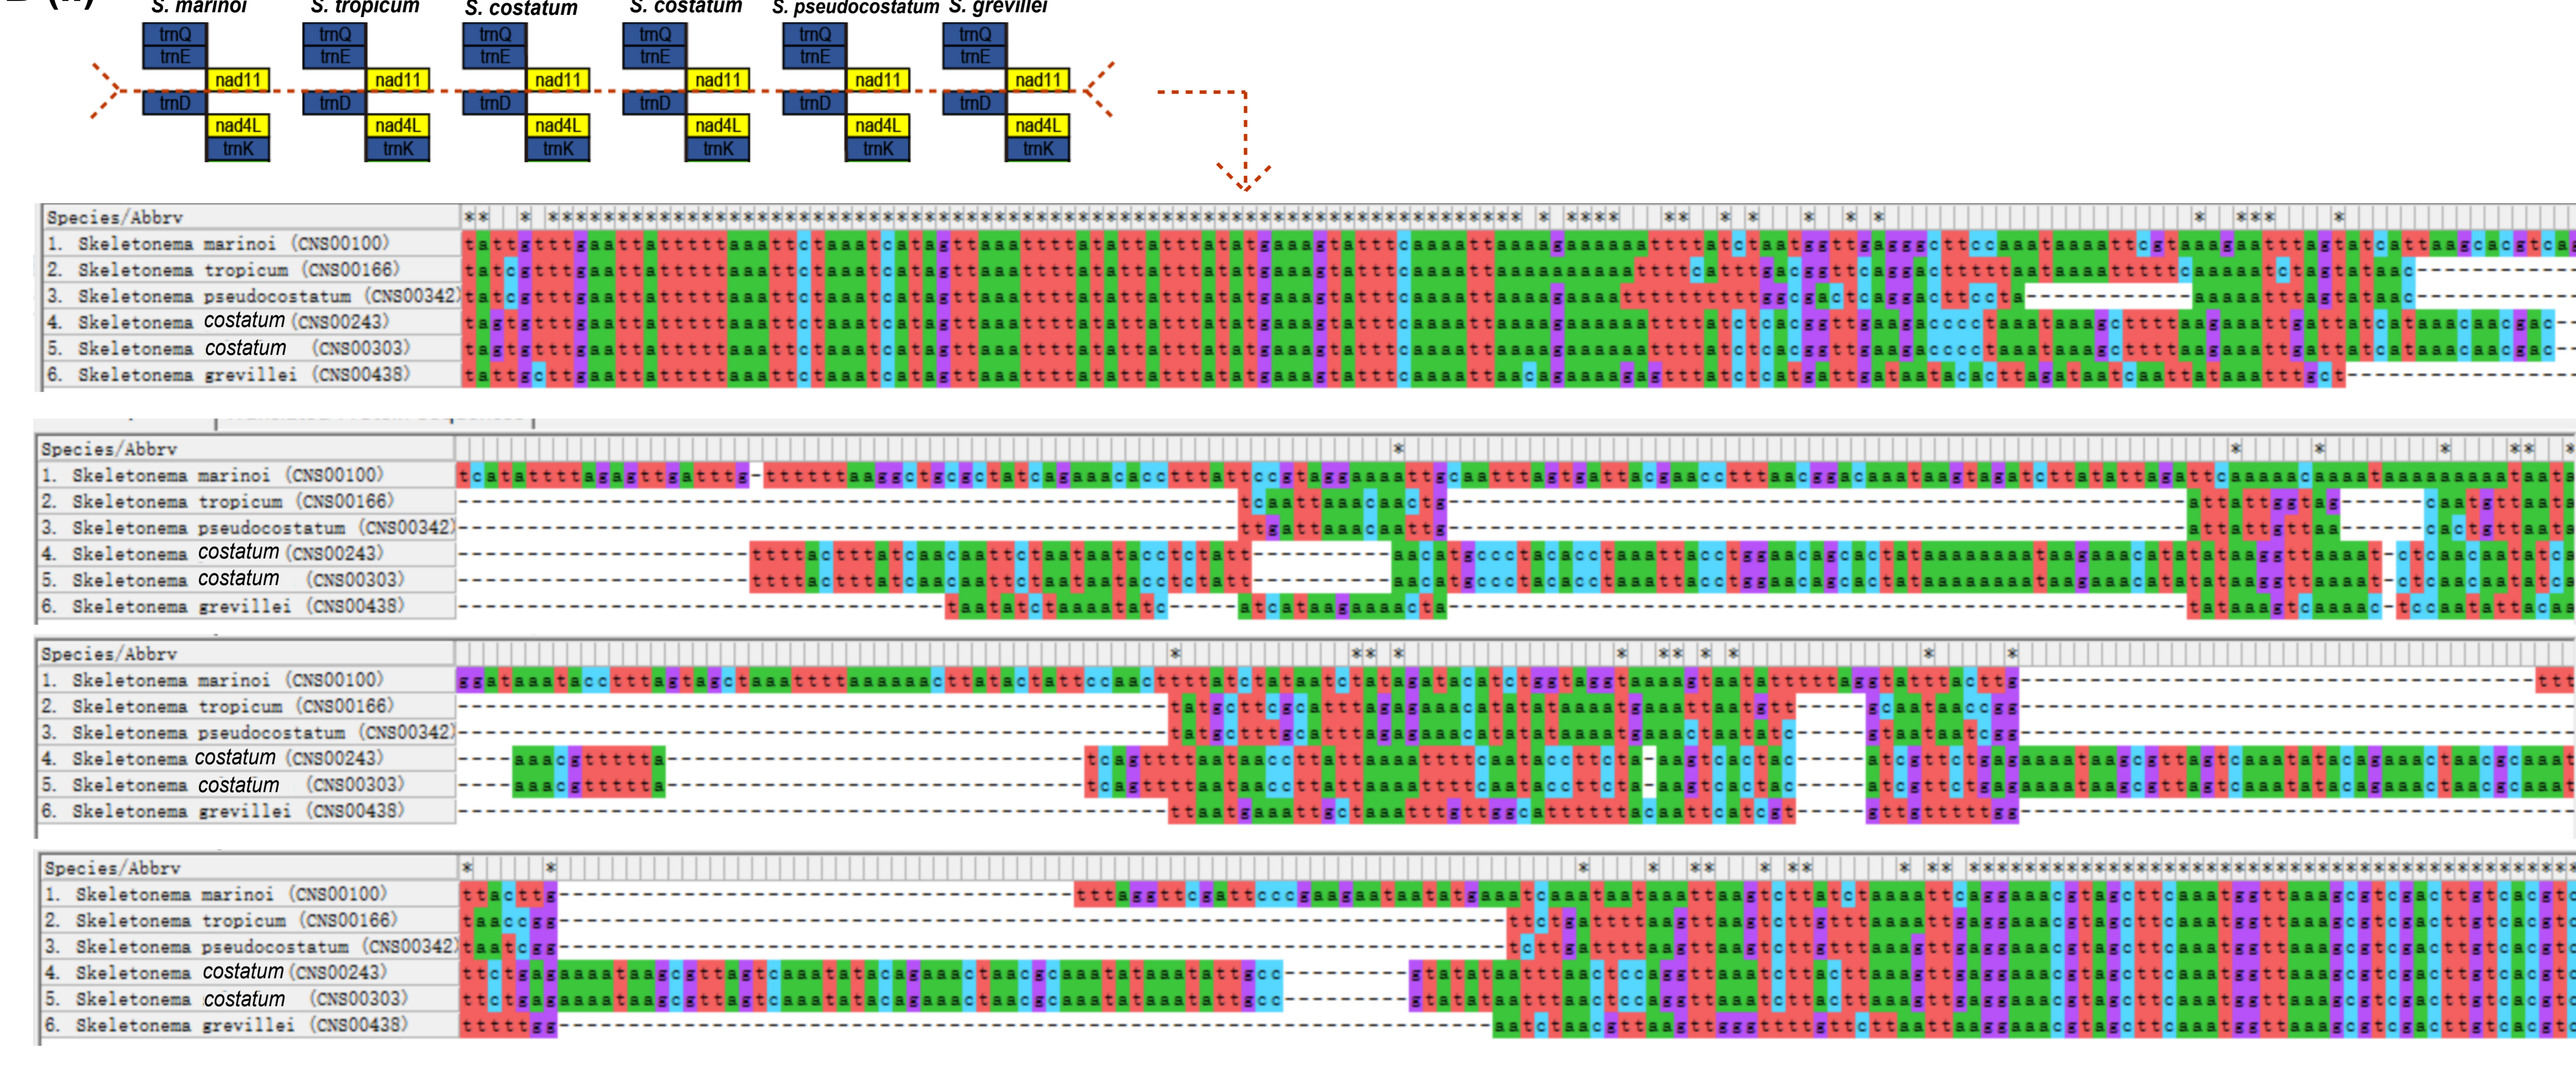

**C (III)**

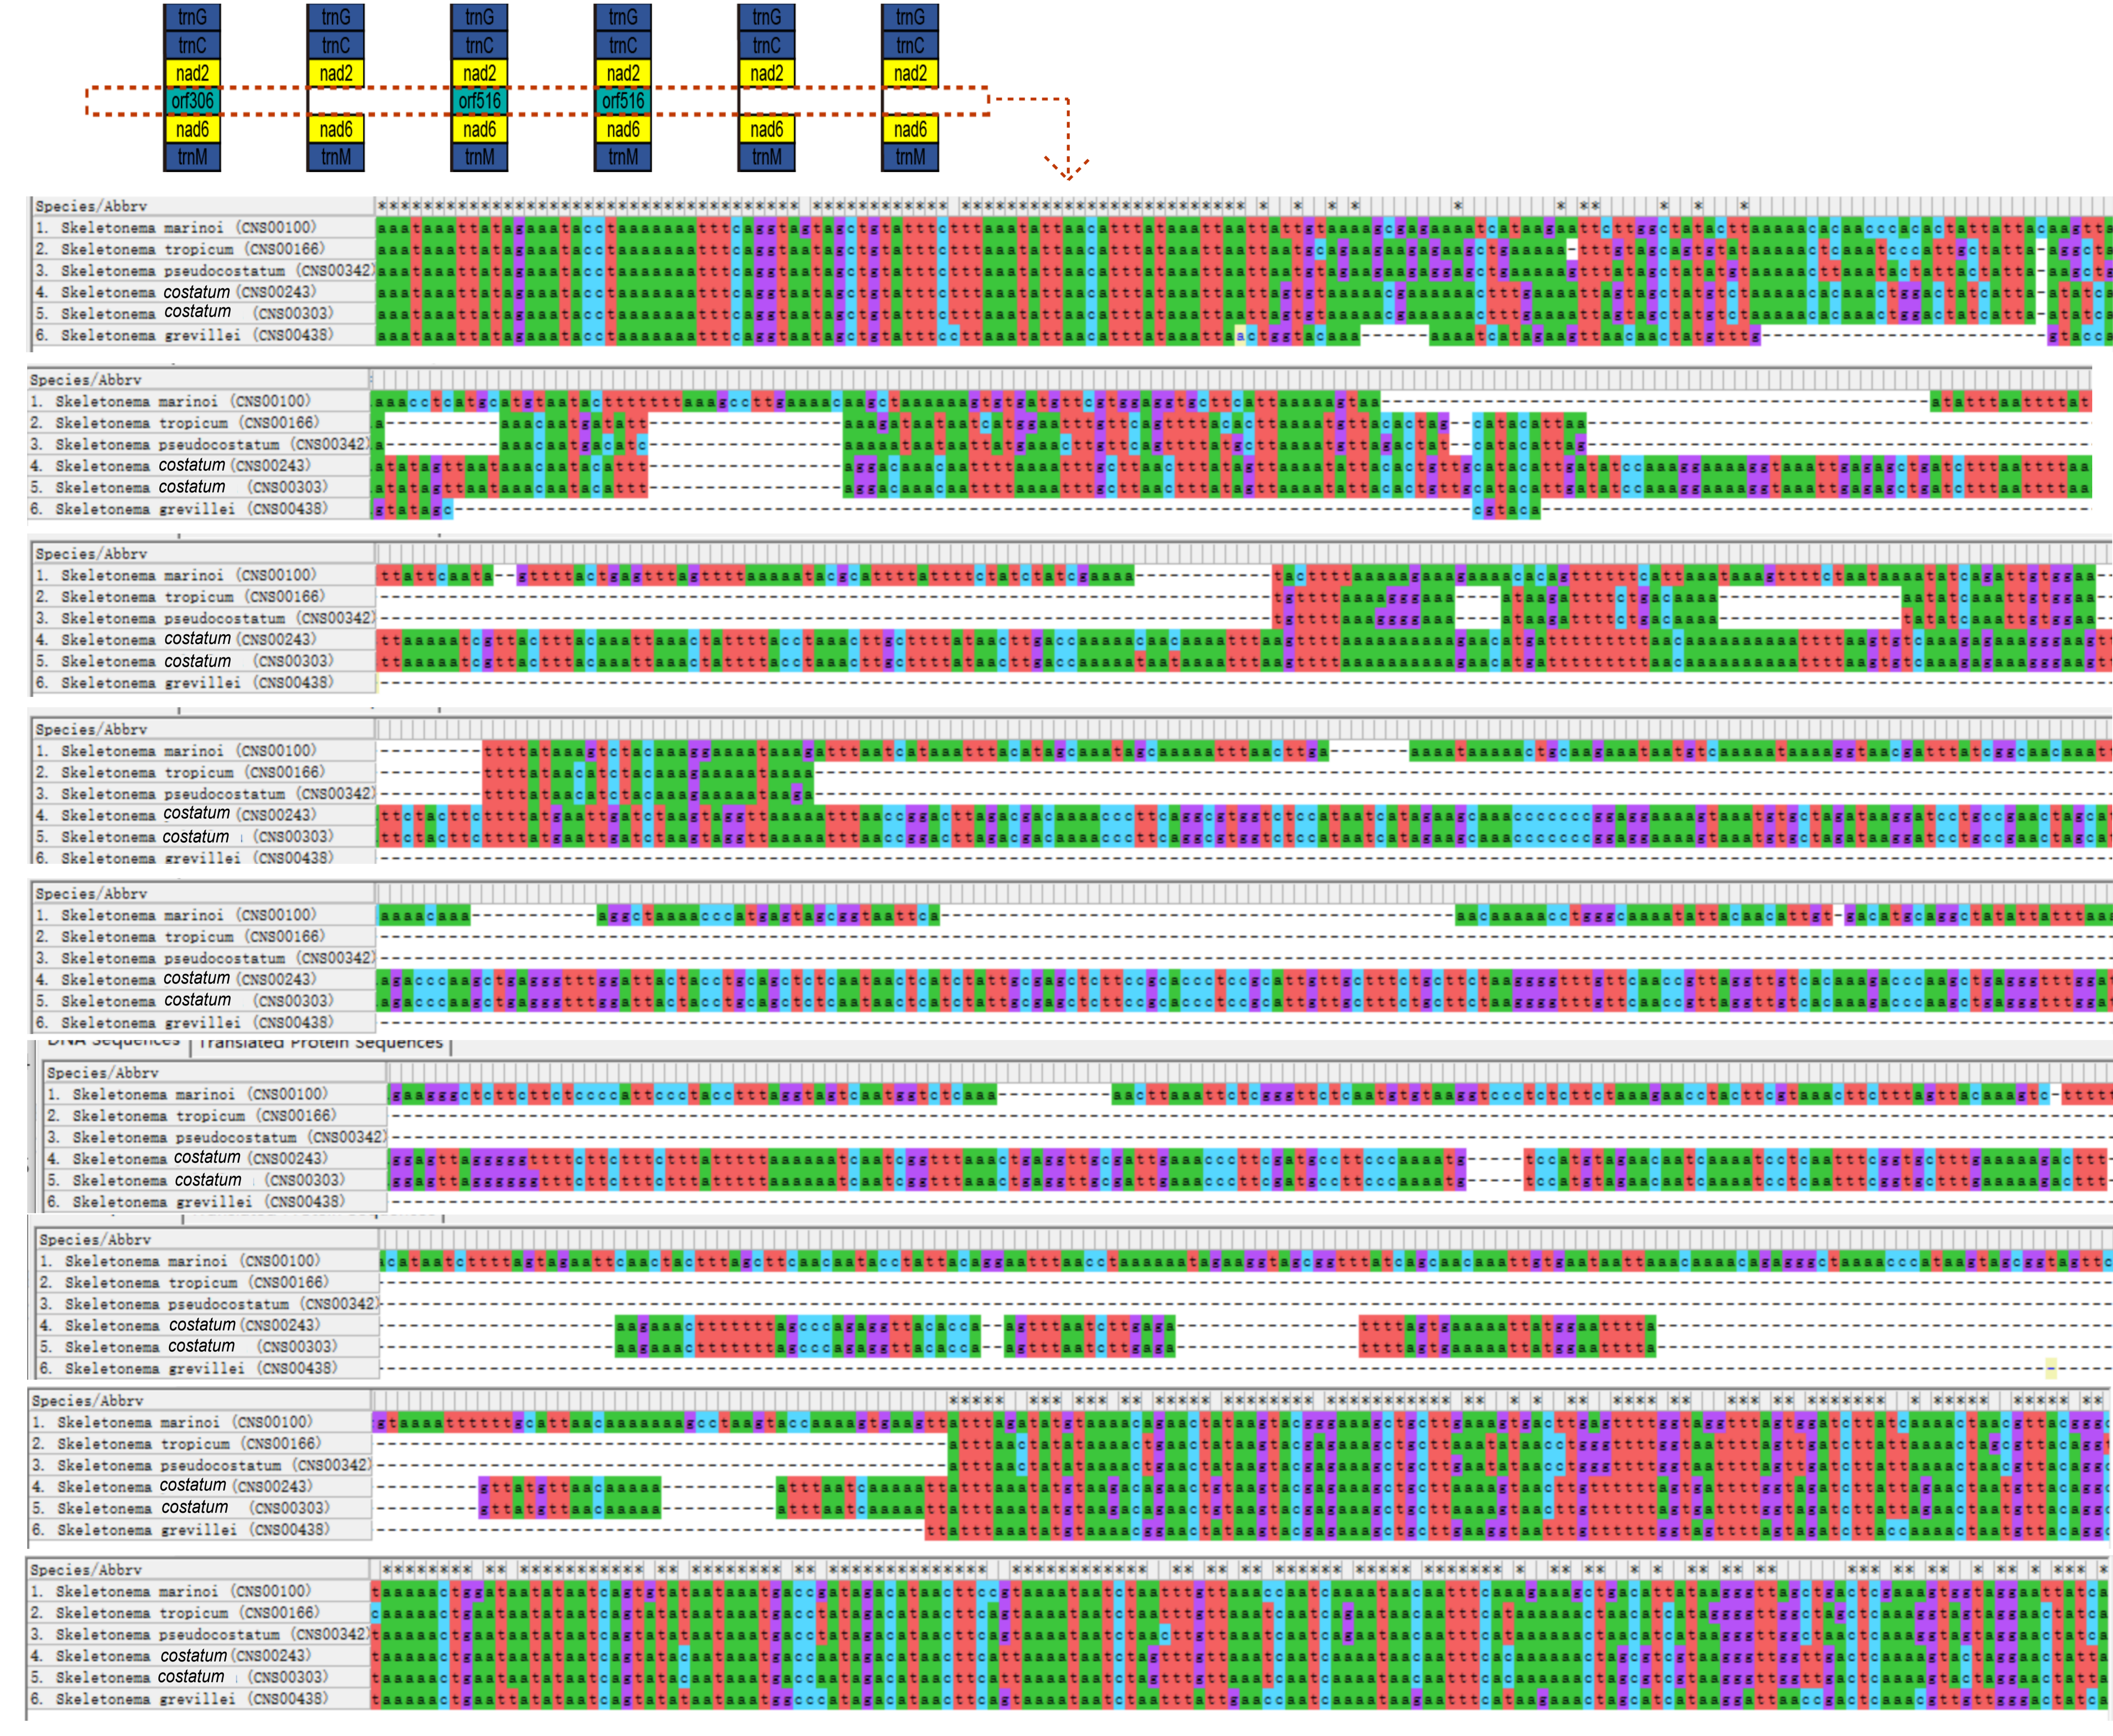

**D (IV)**

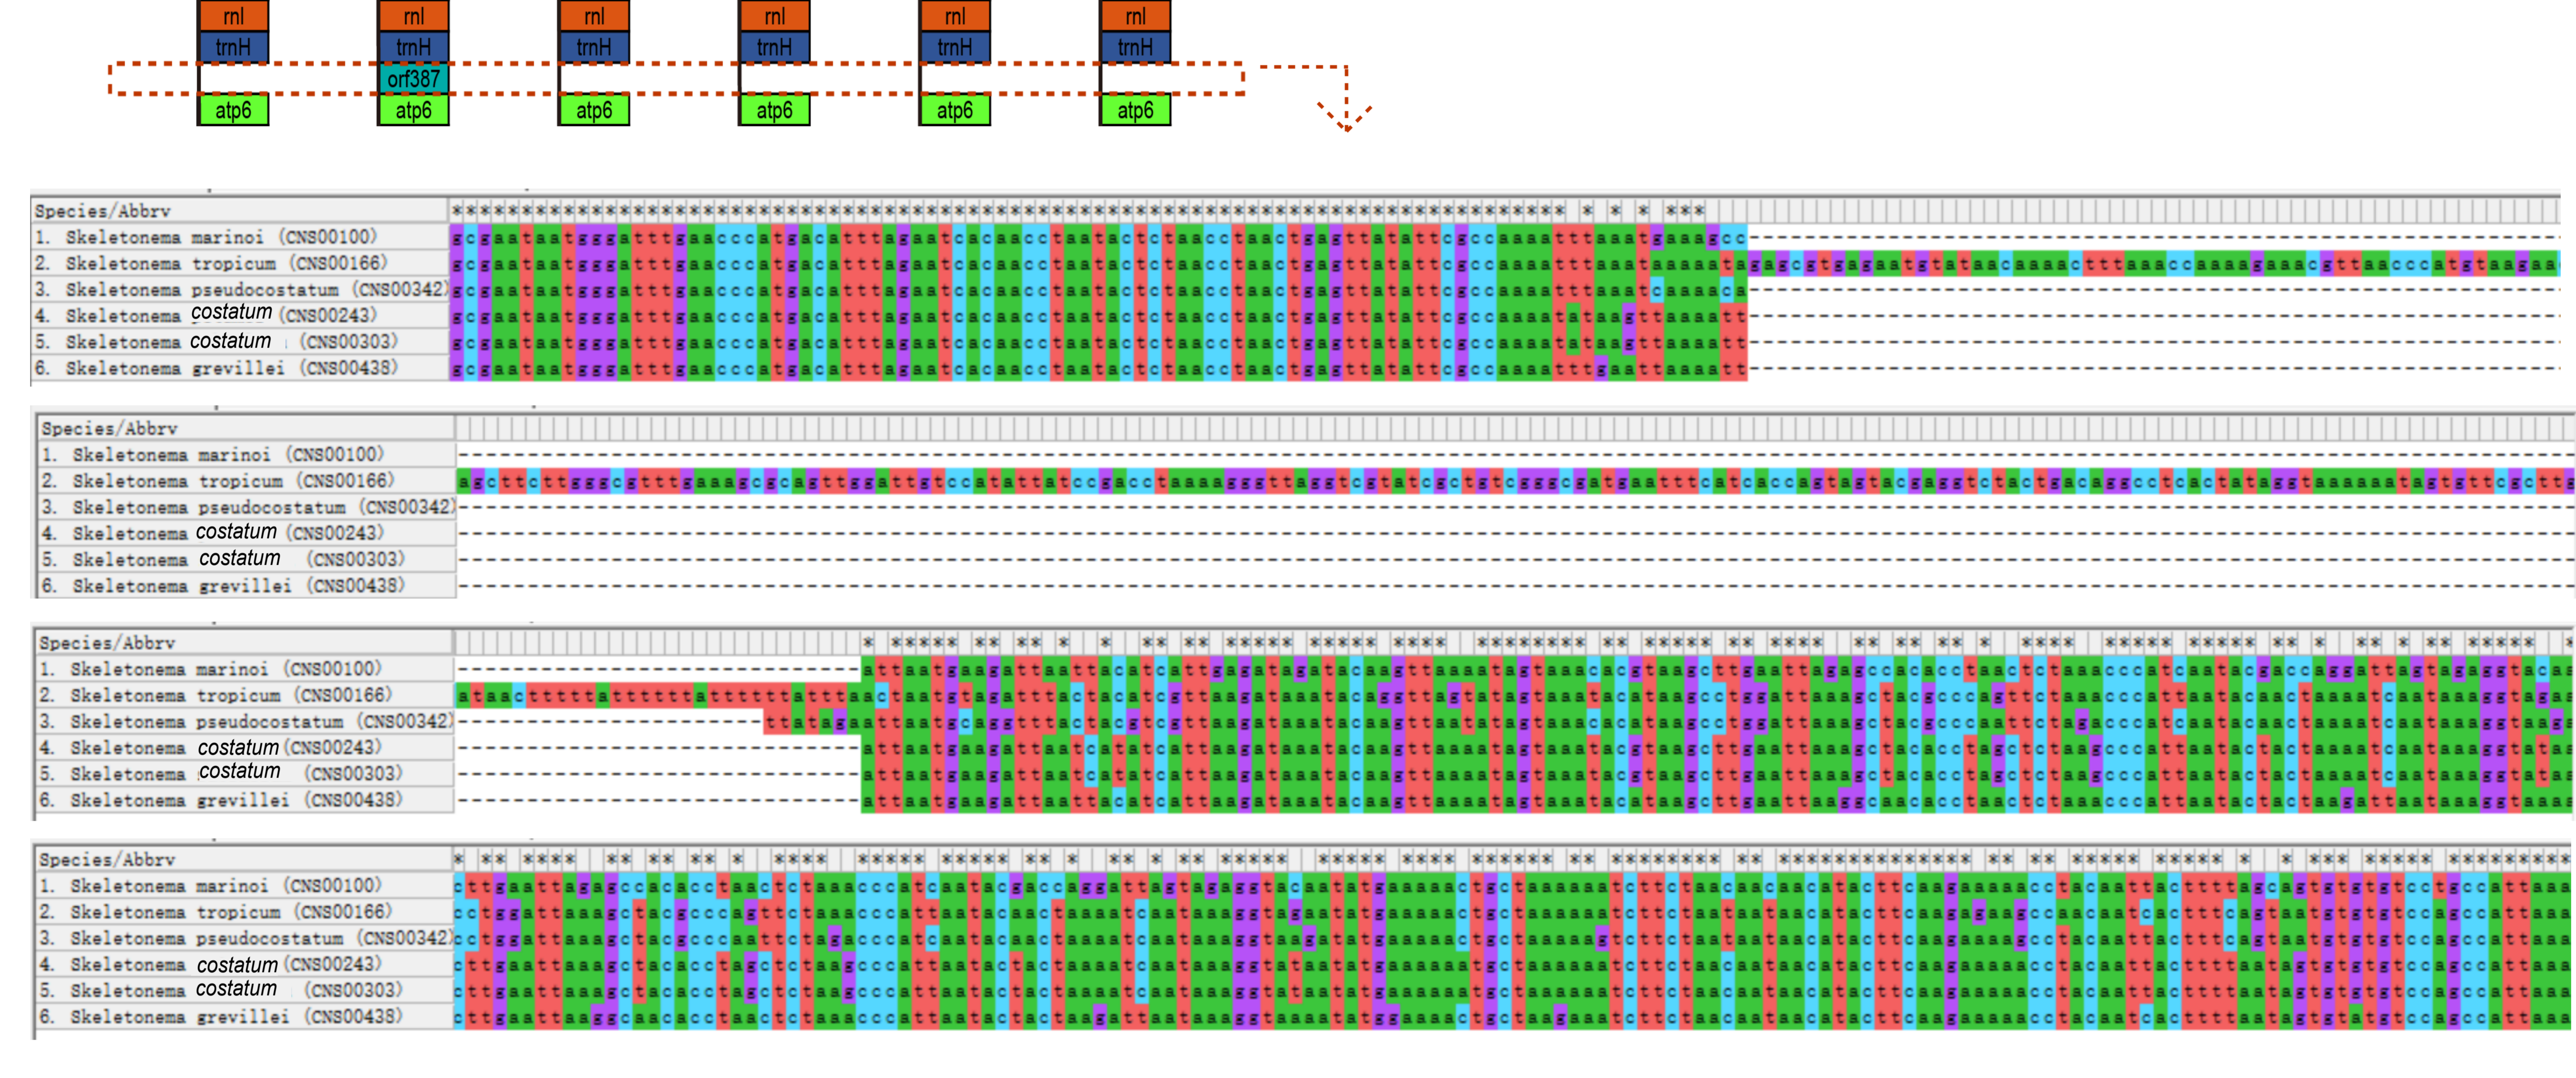

**E (V)**

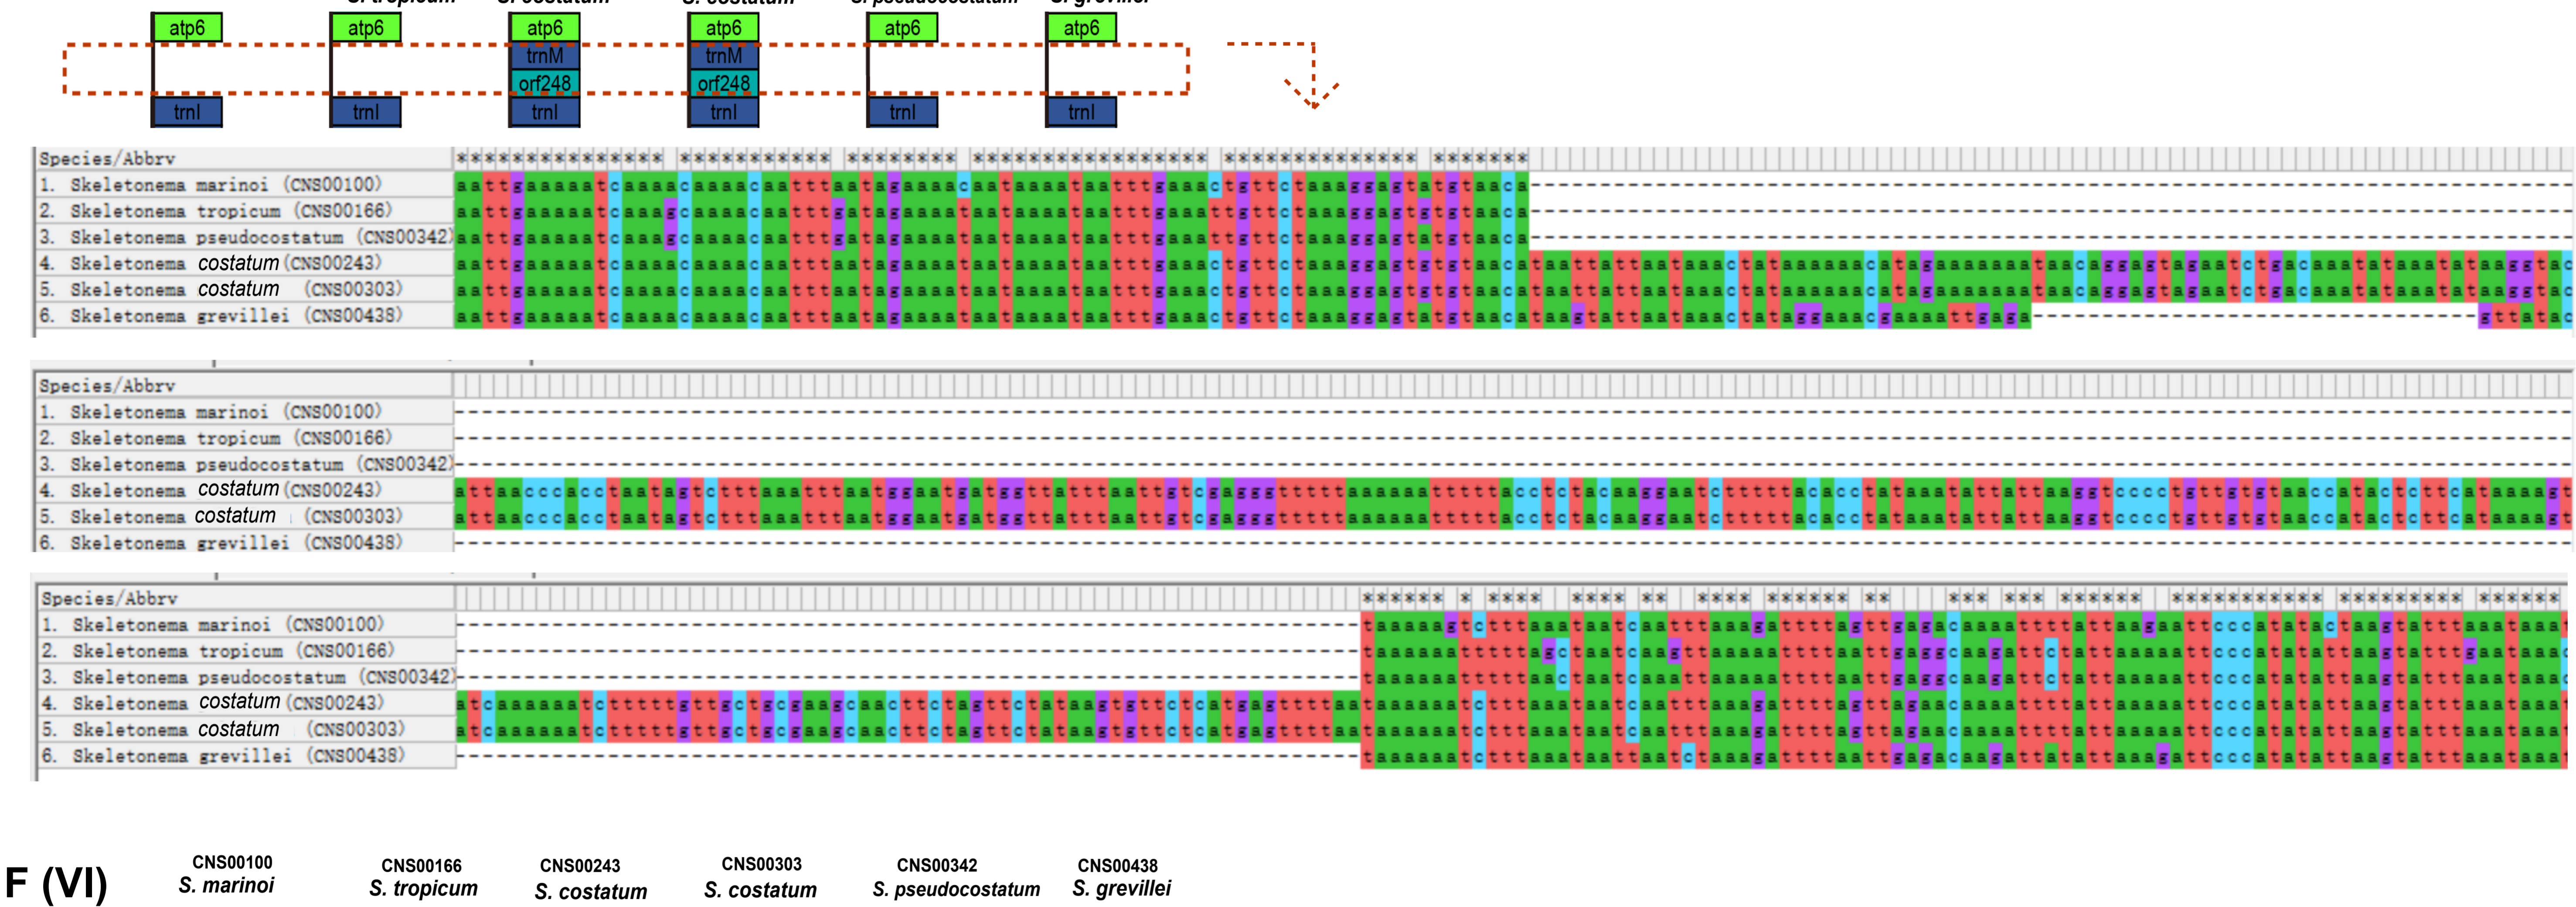

**F (VI)**

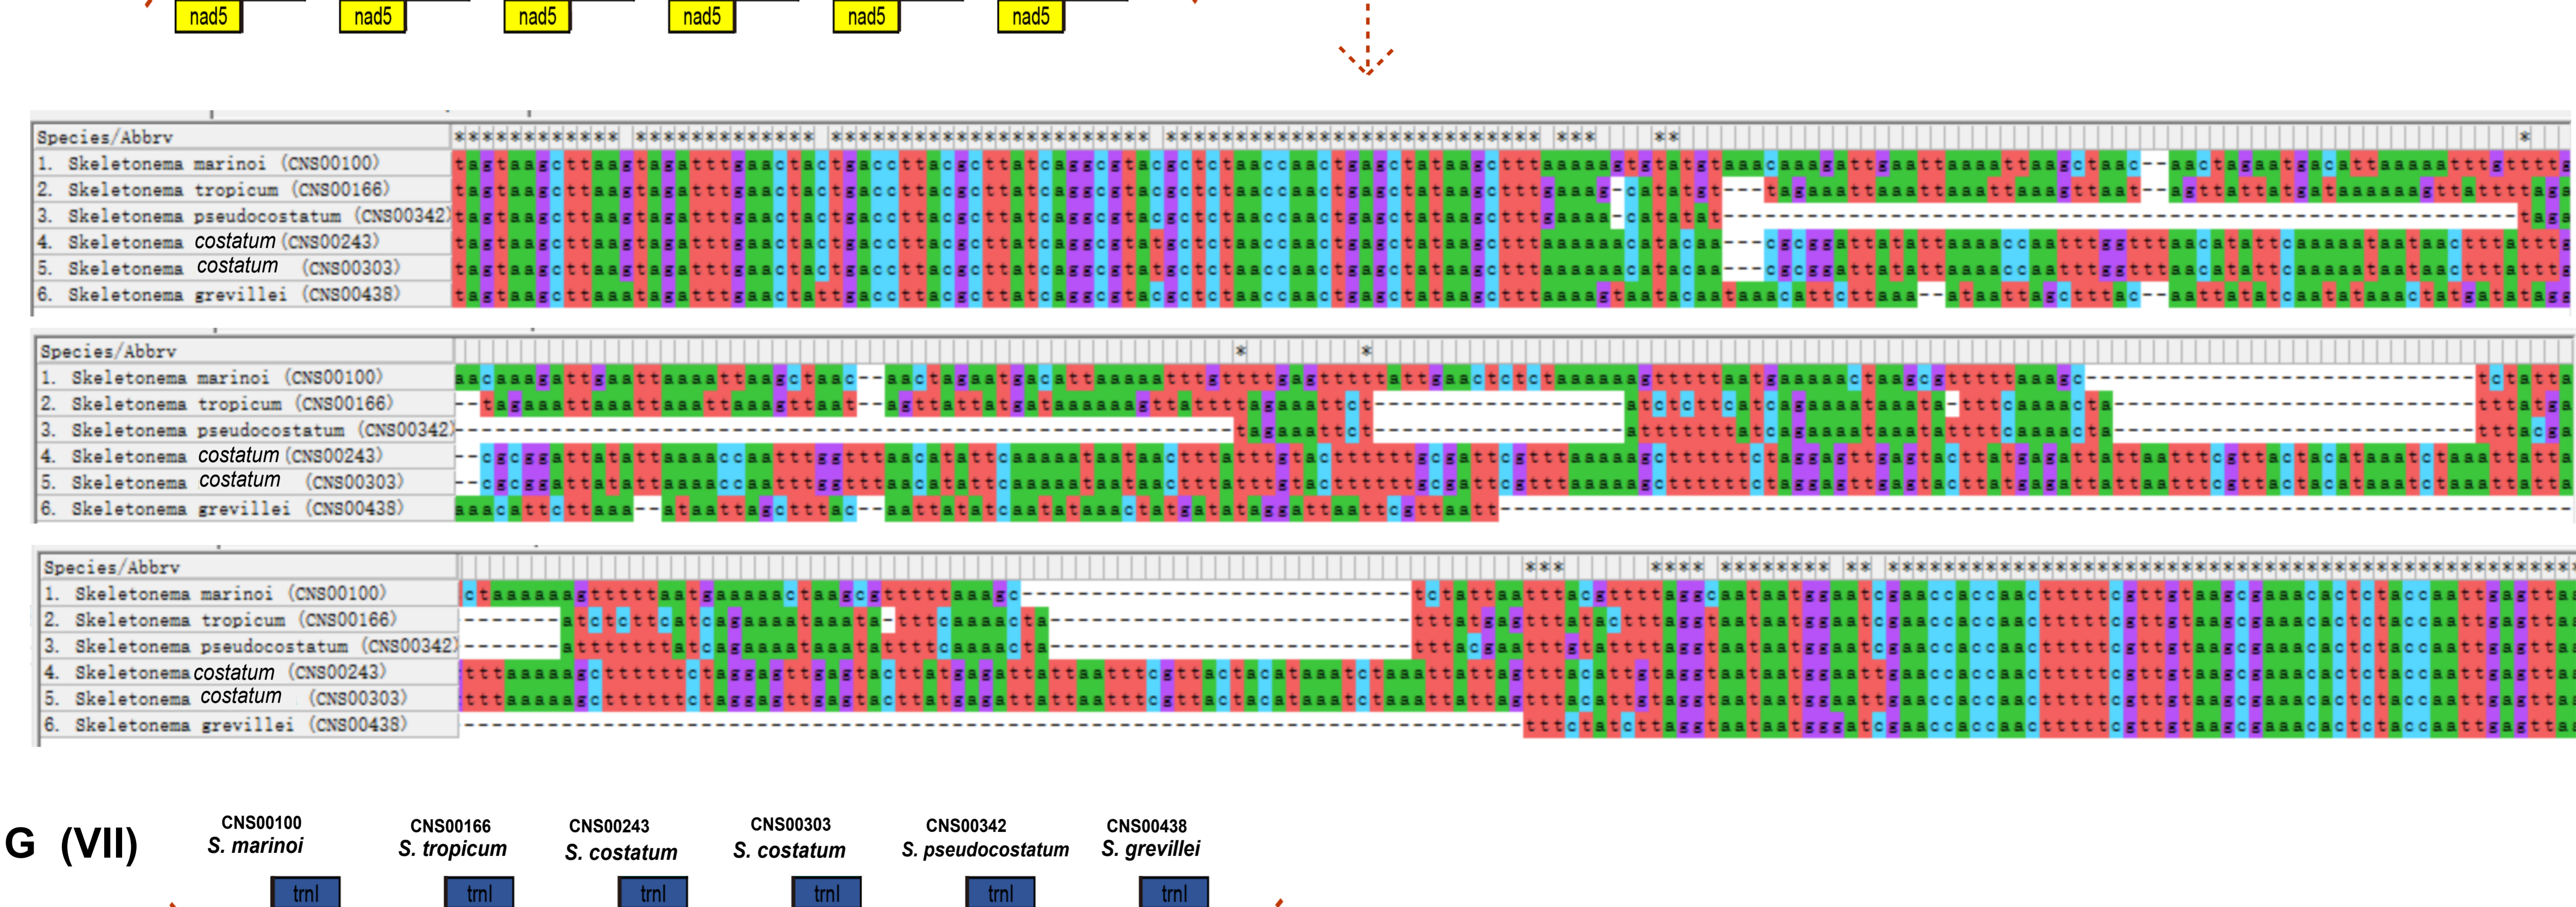

**G (VII)**

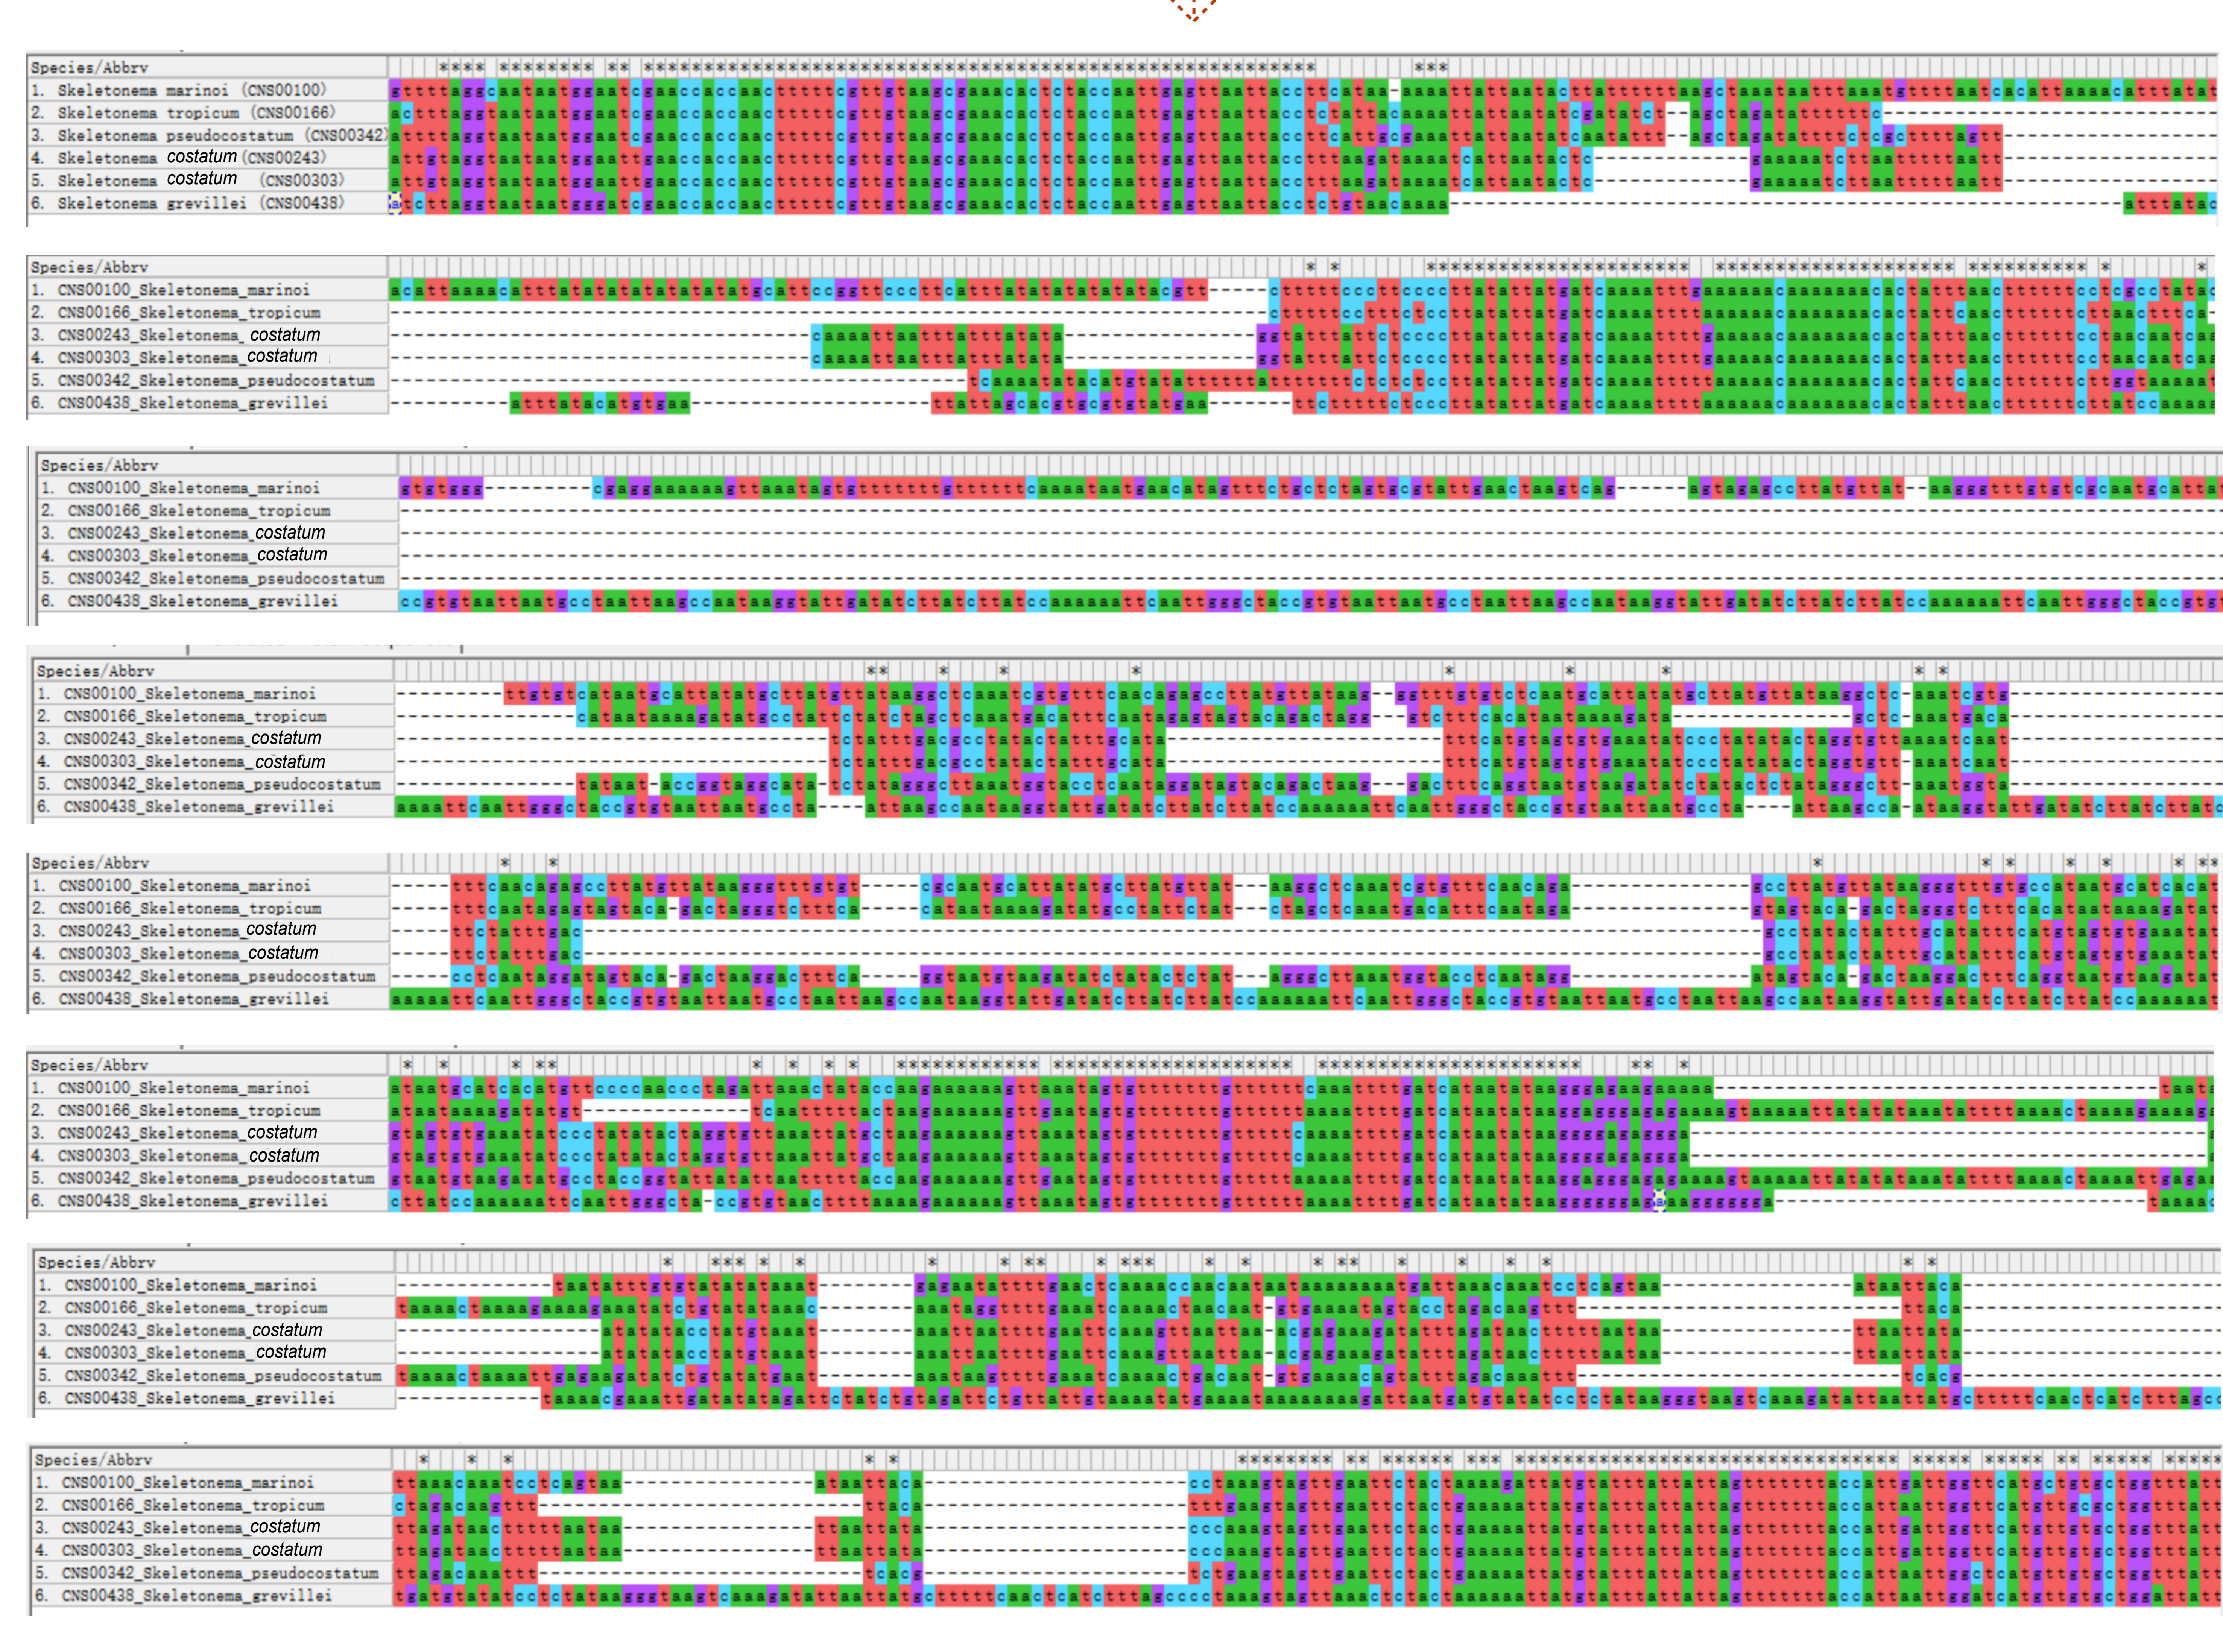

Supplement: 12864_2021_7999_MOESM5_ESM.pdf [file 12864_2021_7999_MOESM5_ESM.pdf]
