# Supplementary material for: Comparative analysis of full-length mitochondrial genomes of five Skeletonema species reveals conserved genome organization and recent speciation
Source: PubMed Central journal article supplement (PMC8520197; doi:10.1186/s12864-021-07999-z), 2021-10-15
Supplement: 12864_2021_7999_MOESM8_ESM.pdf [file 12864_2021_7999_MOESM8_ESM.pdf]

M2

15000  
5000

2500

1000

250

*Phaeocystis globosa*

*Chattonella marina*

*Chaetoceros muelleri*

*Aureococcus anophagefferens*

*Prorocentrum donghaiense*

*Karenia mikimotoi*

*Alexandrium tamarense*

*Thalassiosira pseudonana*

*Isochrysis galbana*

*Amphidinium carterae*

*Heterosigma akashiwo*

M1

VI

2000

750

500

250

100

*Phaeocystis globosa*

*Chattonella marina*

*Chaetoceros muelleri*

*Aureococcus anophagefferens*

*Prorocentrum donghaiense*

*Karenia mikimotoi*

*Alexandrium tamarense*

*Thalassiosira pseudonana*

*Isochrysis galbana*

*Amphidinium carterae*

*Heterosigma akashiwo*

COX1

M1

M2

15000

5000

2500

1000

2000

750

500

250

100

*S. grevillei*

*S. pseudocostatum*

*S. costatum* (CNS00303)

*S. costatum* (CNS00243)

*S. tropicum*

*S. marinoi*

COX1
