# Supplementary material for: Comparative analysis of full-length mitochondrial genomes of five Skeletonema species reveals conserved genome organization and recent speciation
Source: PubMed Central journal article supplement (PMC8520197; doi:10.1186/s12864-021-07999-z), 2021-10-15

**A** (*S. marinoi*)

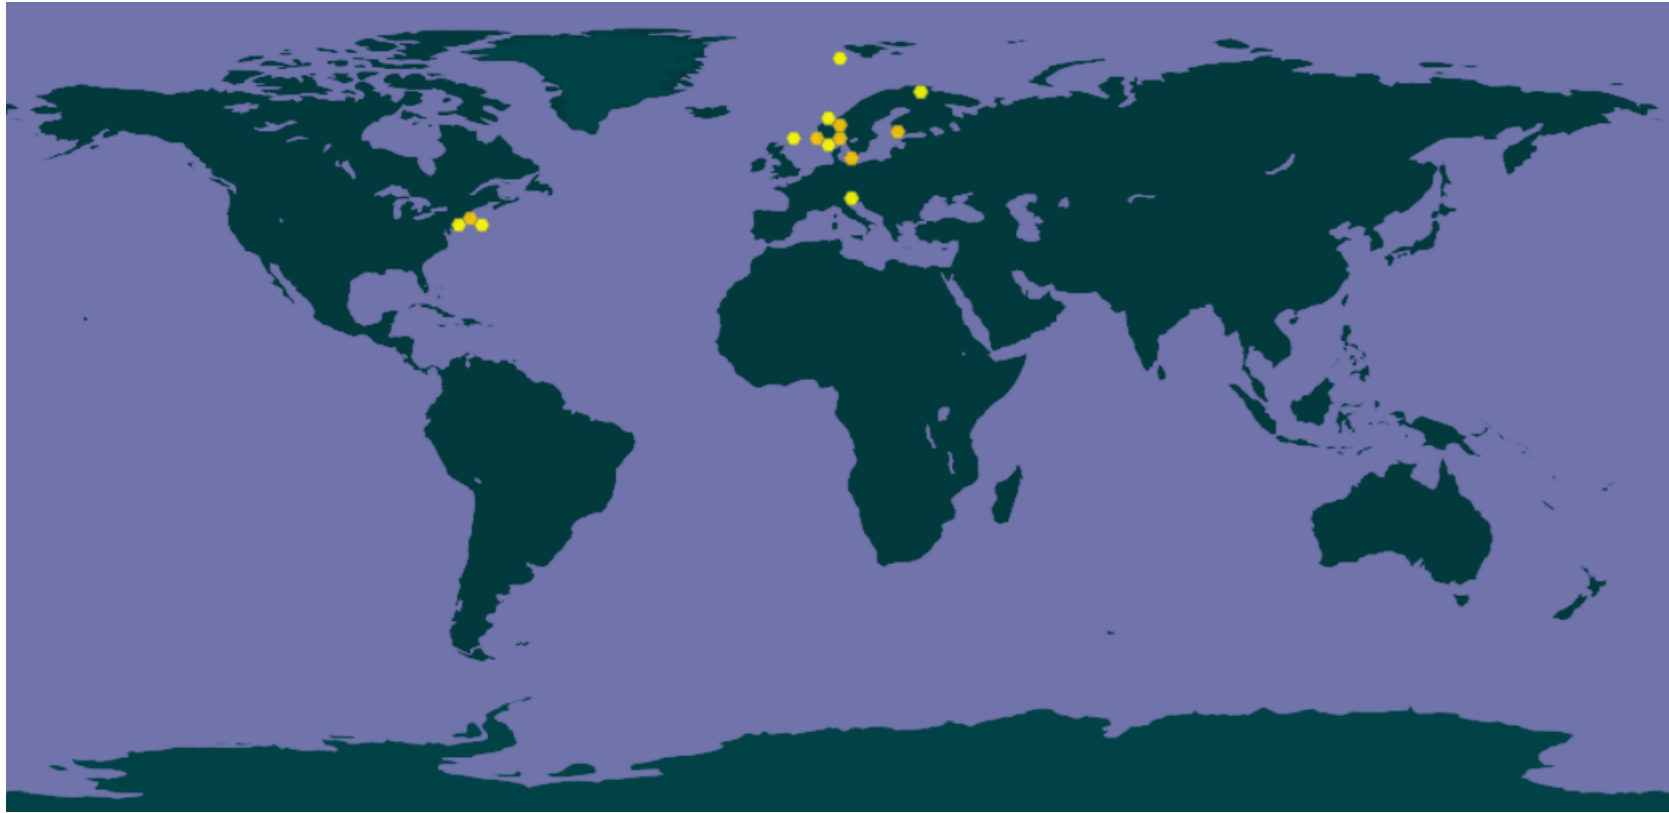

**D** (*S. costatum*)

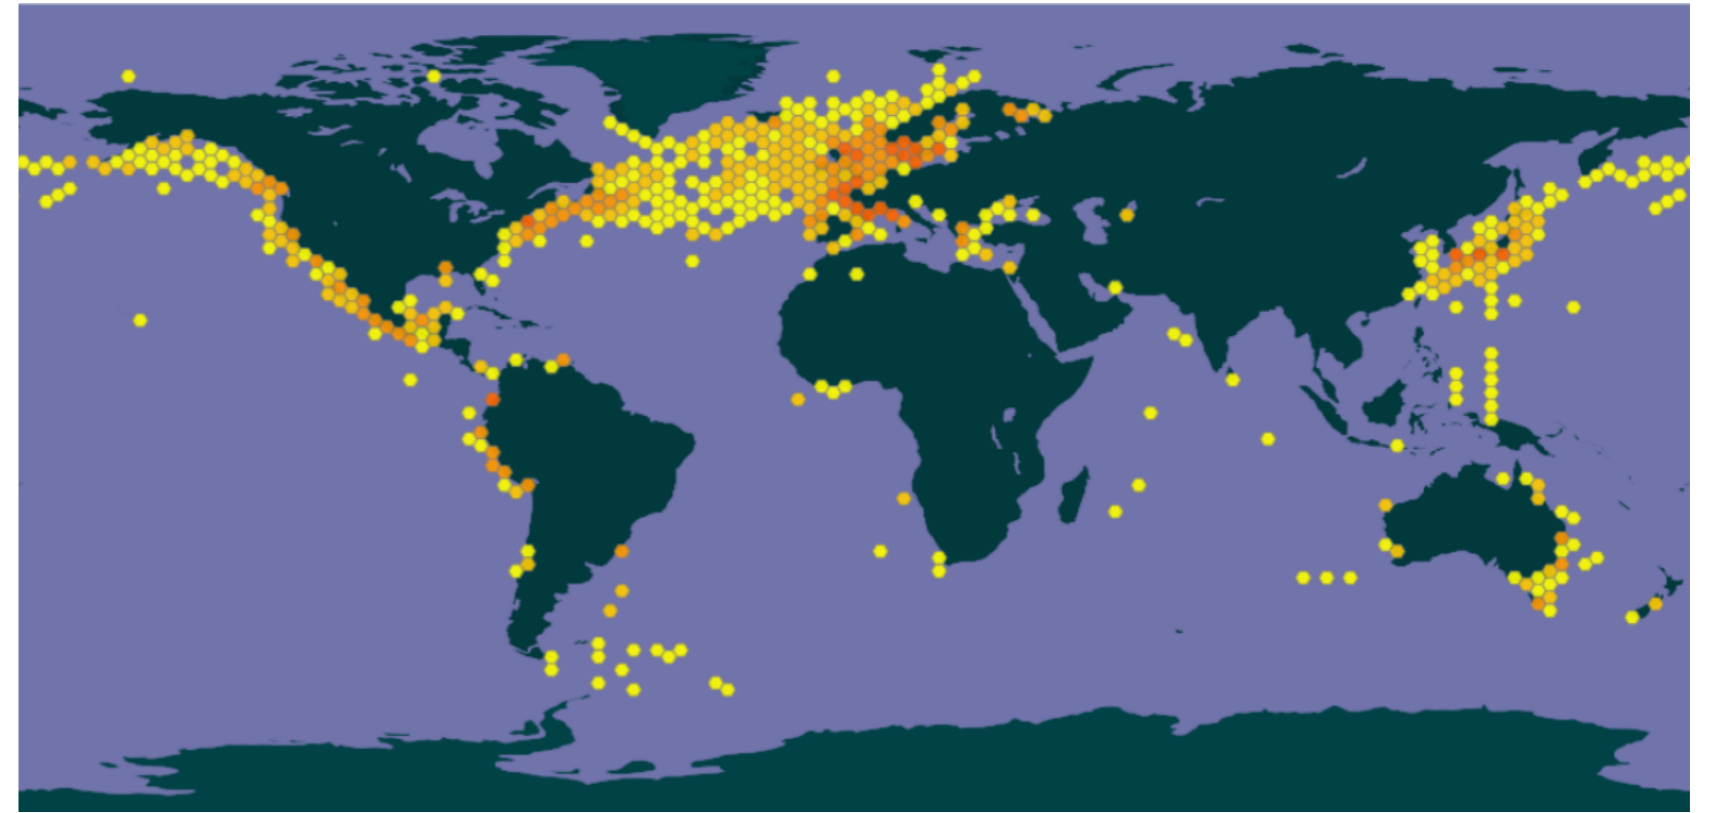

**B** (*S. tropicum*)

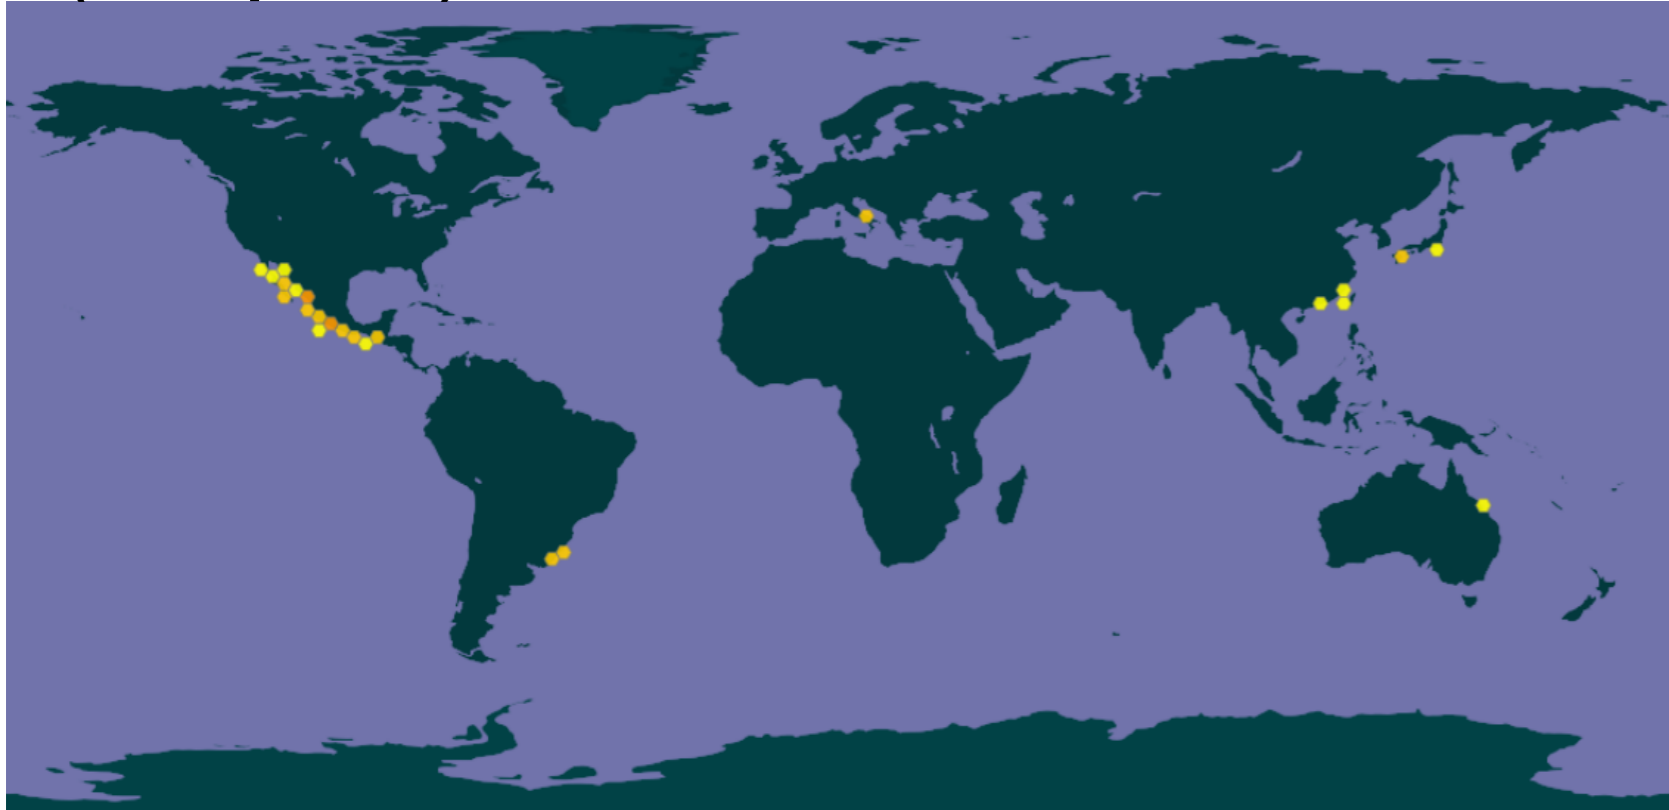

**E** (*S. grevillei*)

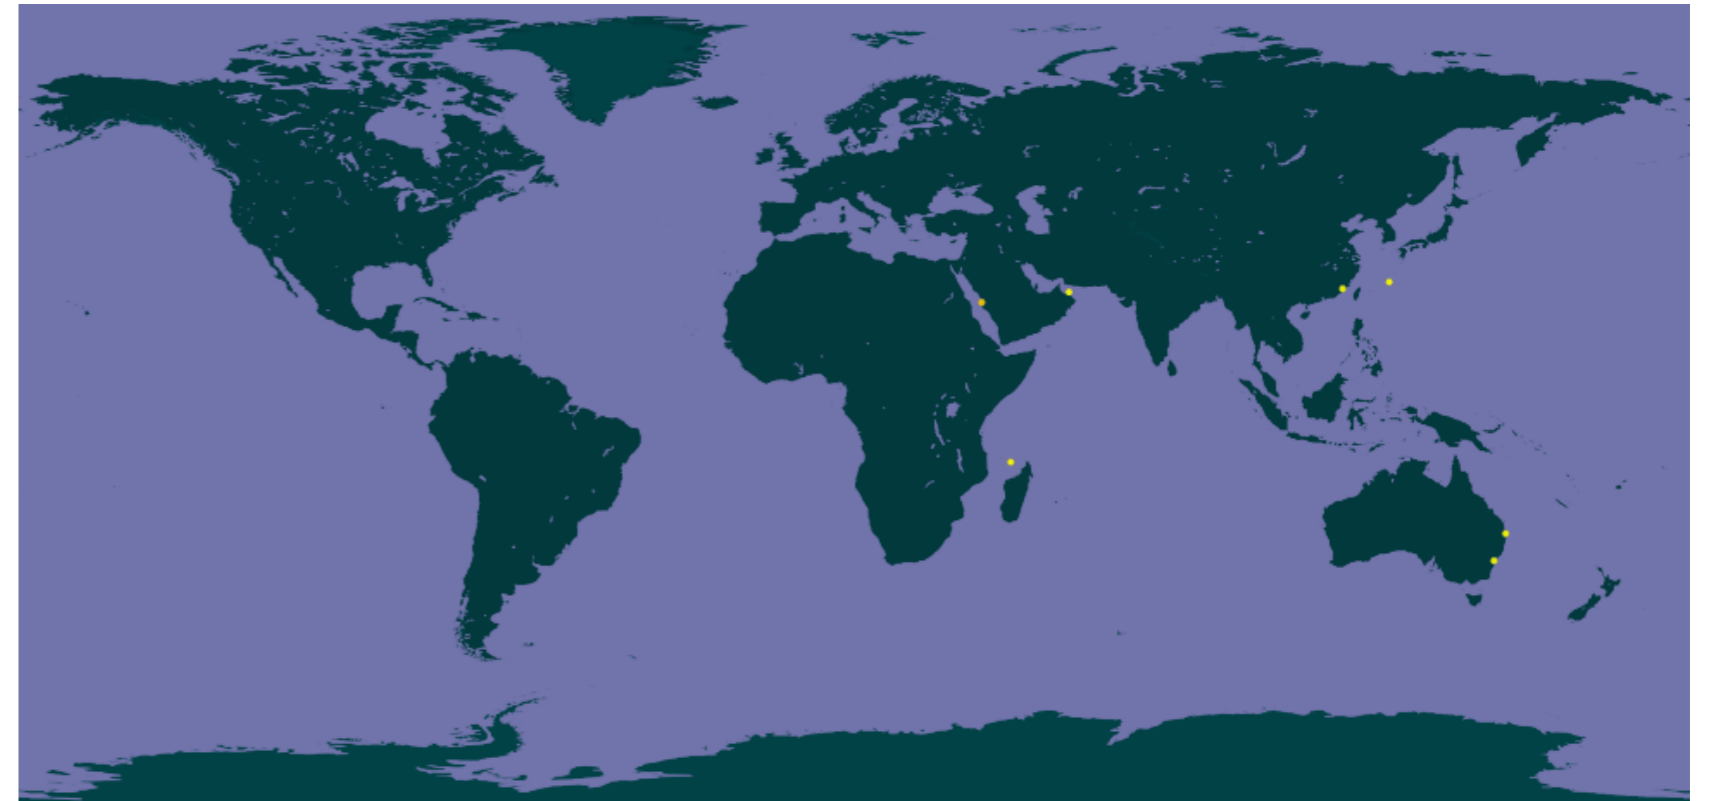

**C** (*S. pseudocostatum*)

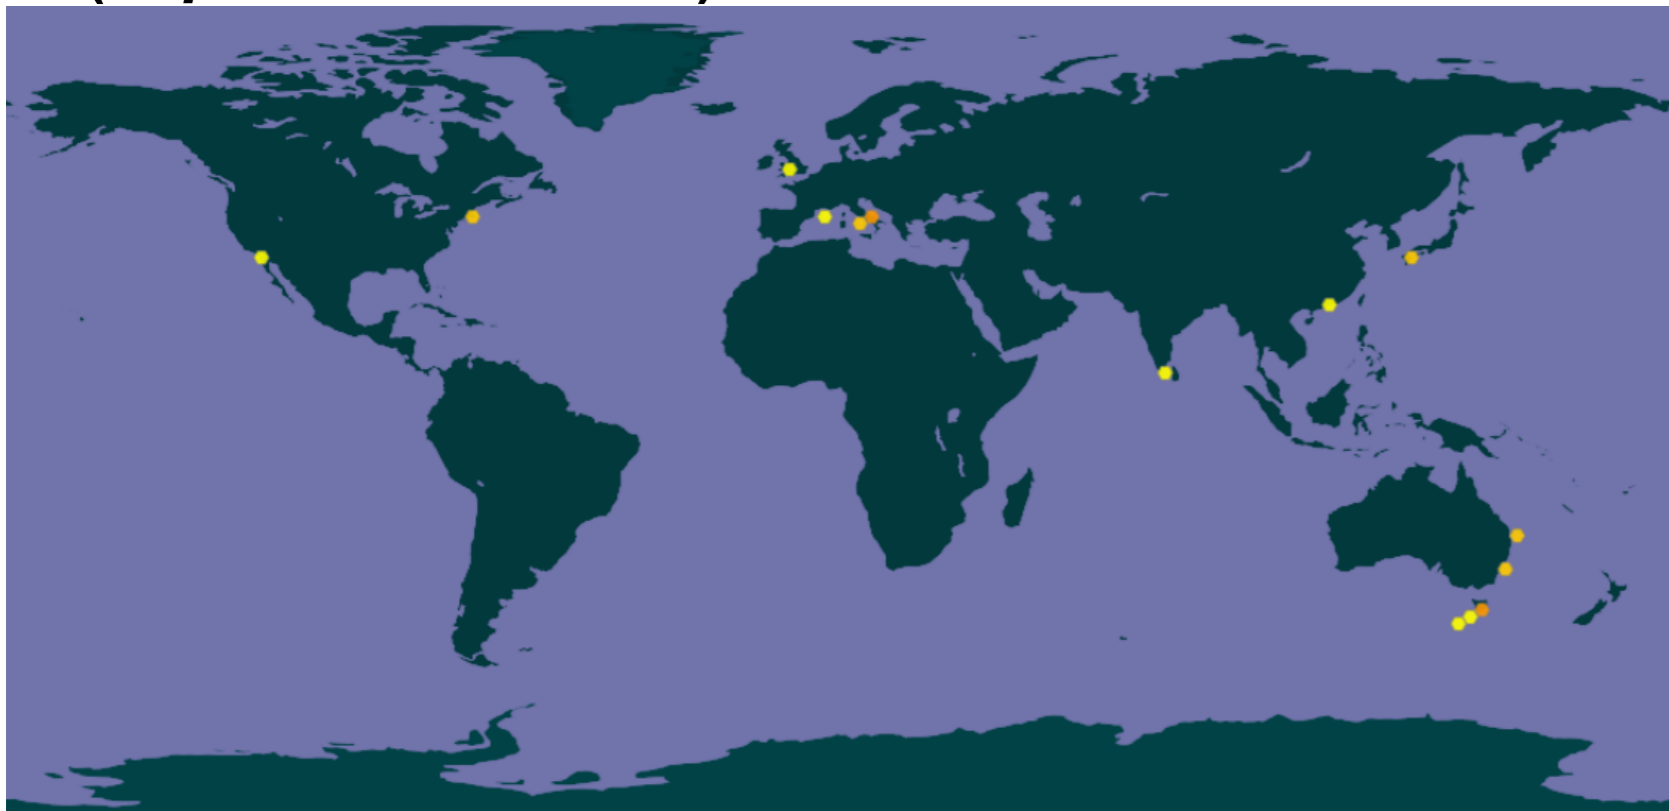

Supplement: 12864_2021_7999_MOESM10_ESM.pdf [file 12864_2021_7999_MOESM10_ESM.pdf]
