# Supplementary material for: Comparative analysis of full-length mitochondrial genomes of five Skeletonema species reveals conserved genome organization and recent speciation
Source: PubMed Central journal article supplement (PMC8520197; doi:10.1186/s12864-021-07999-z), 2021-10-15

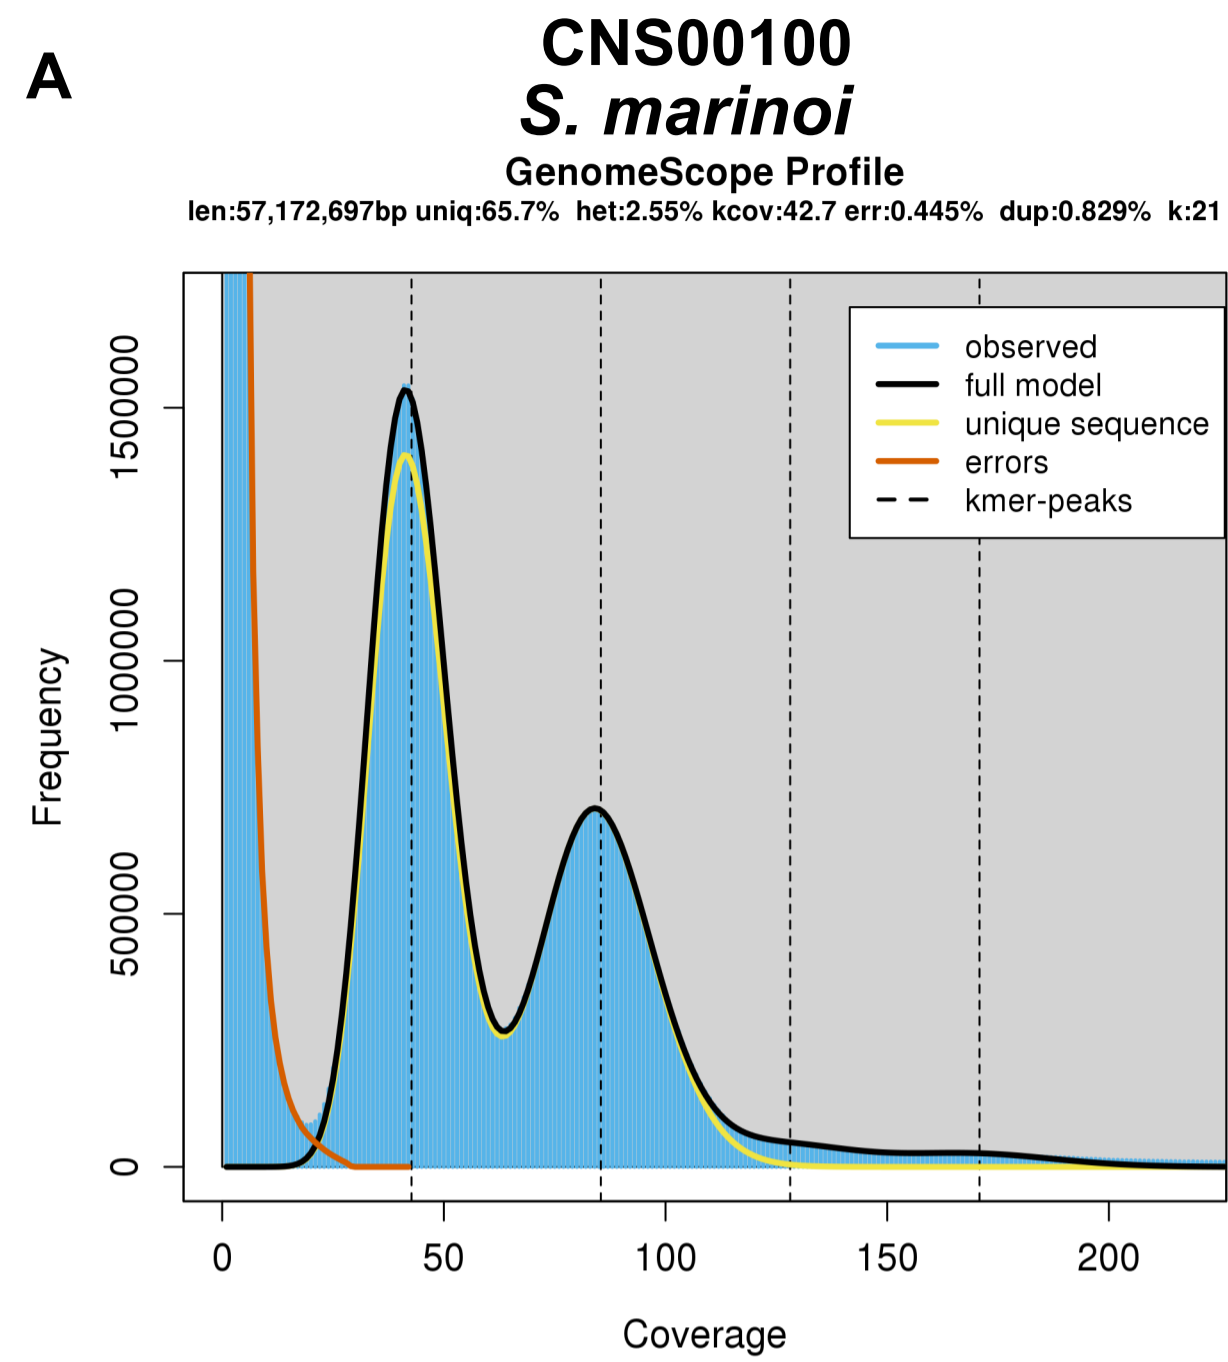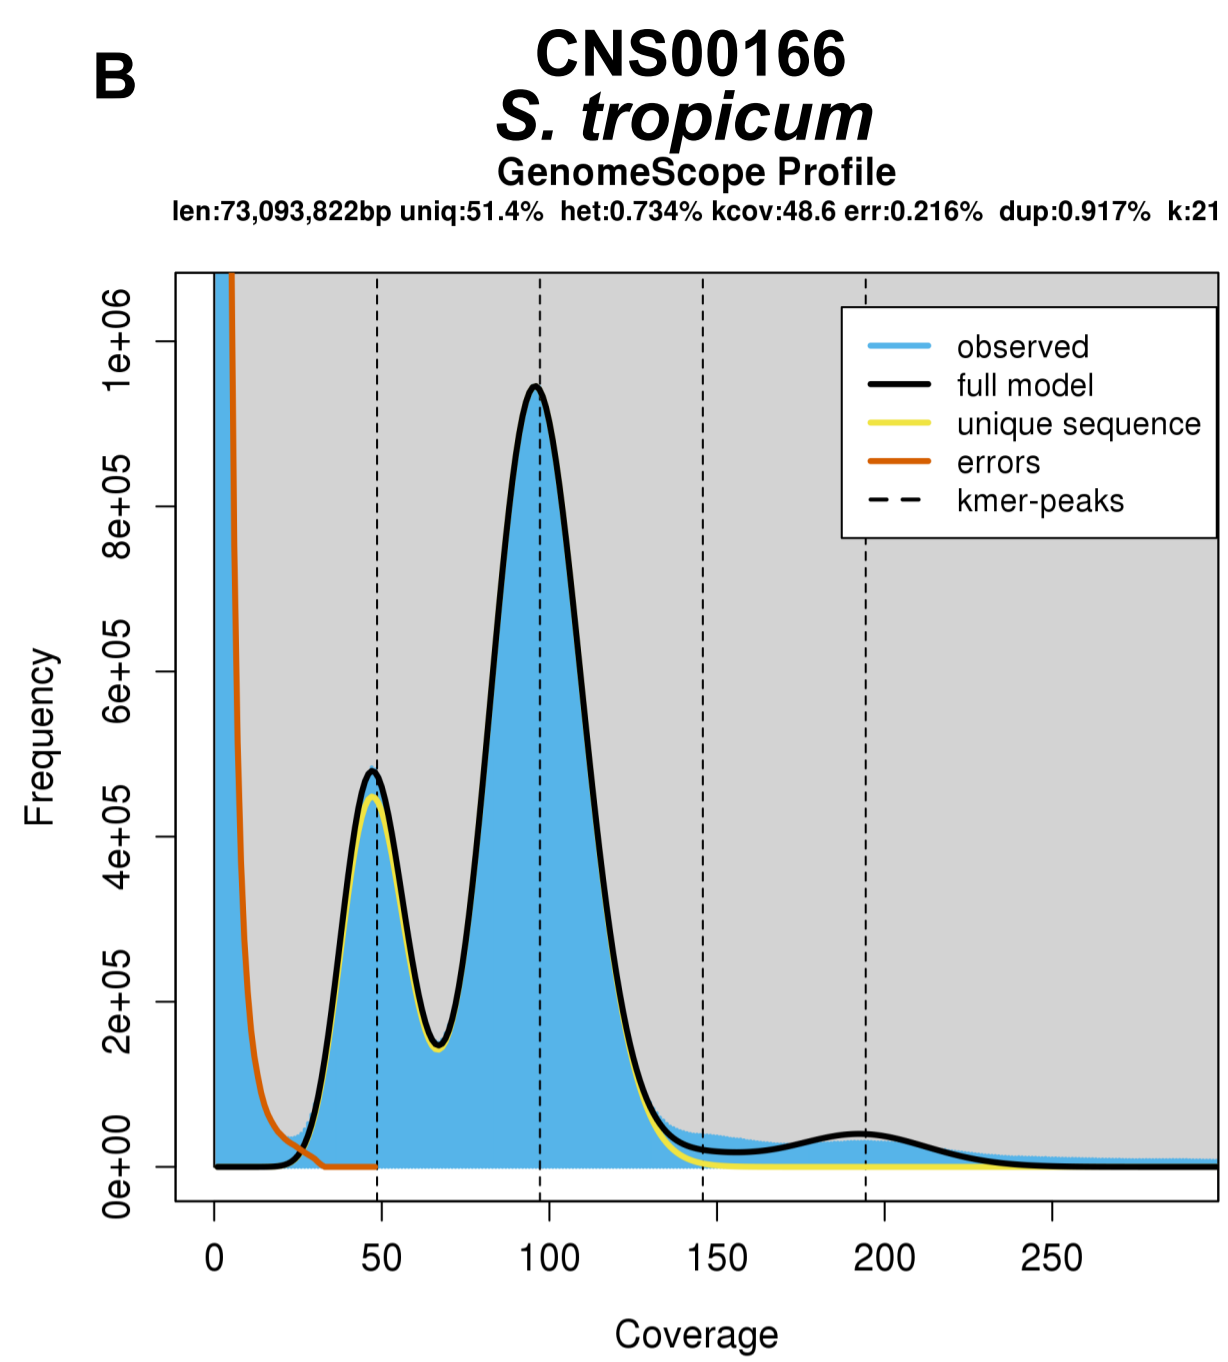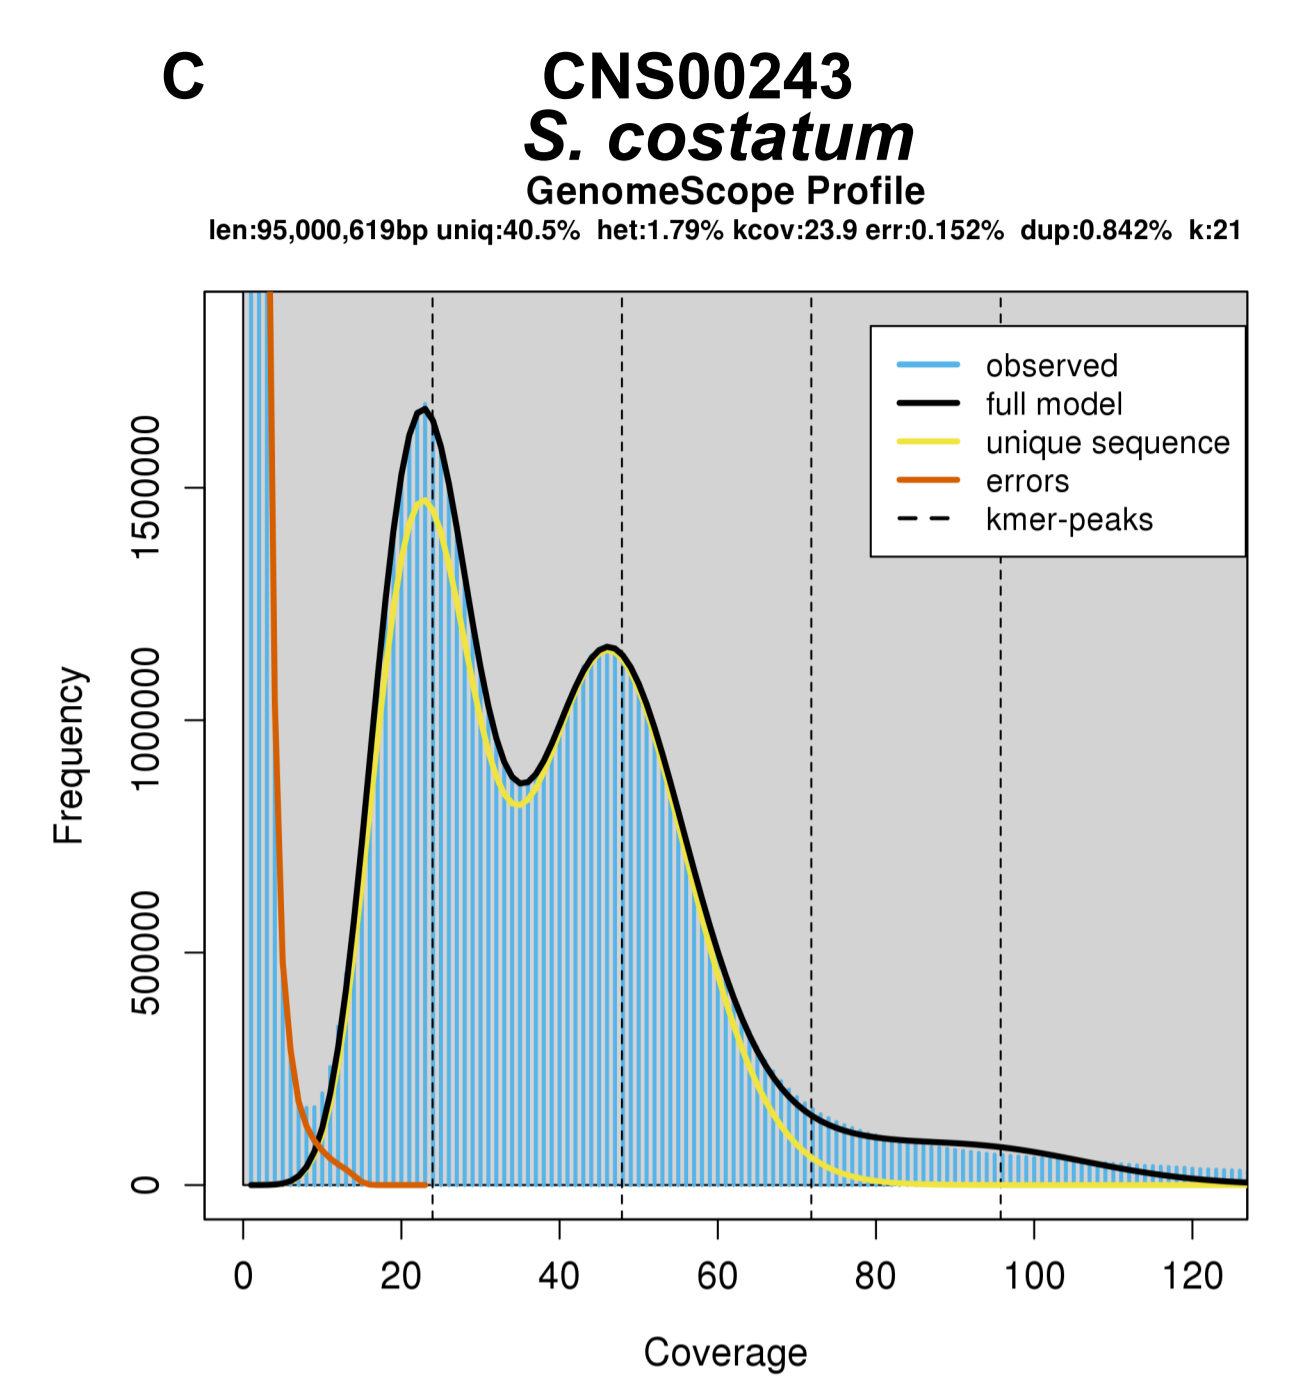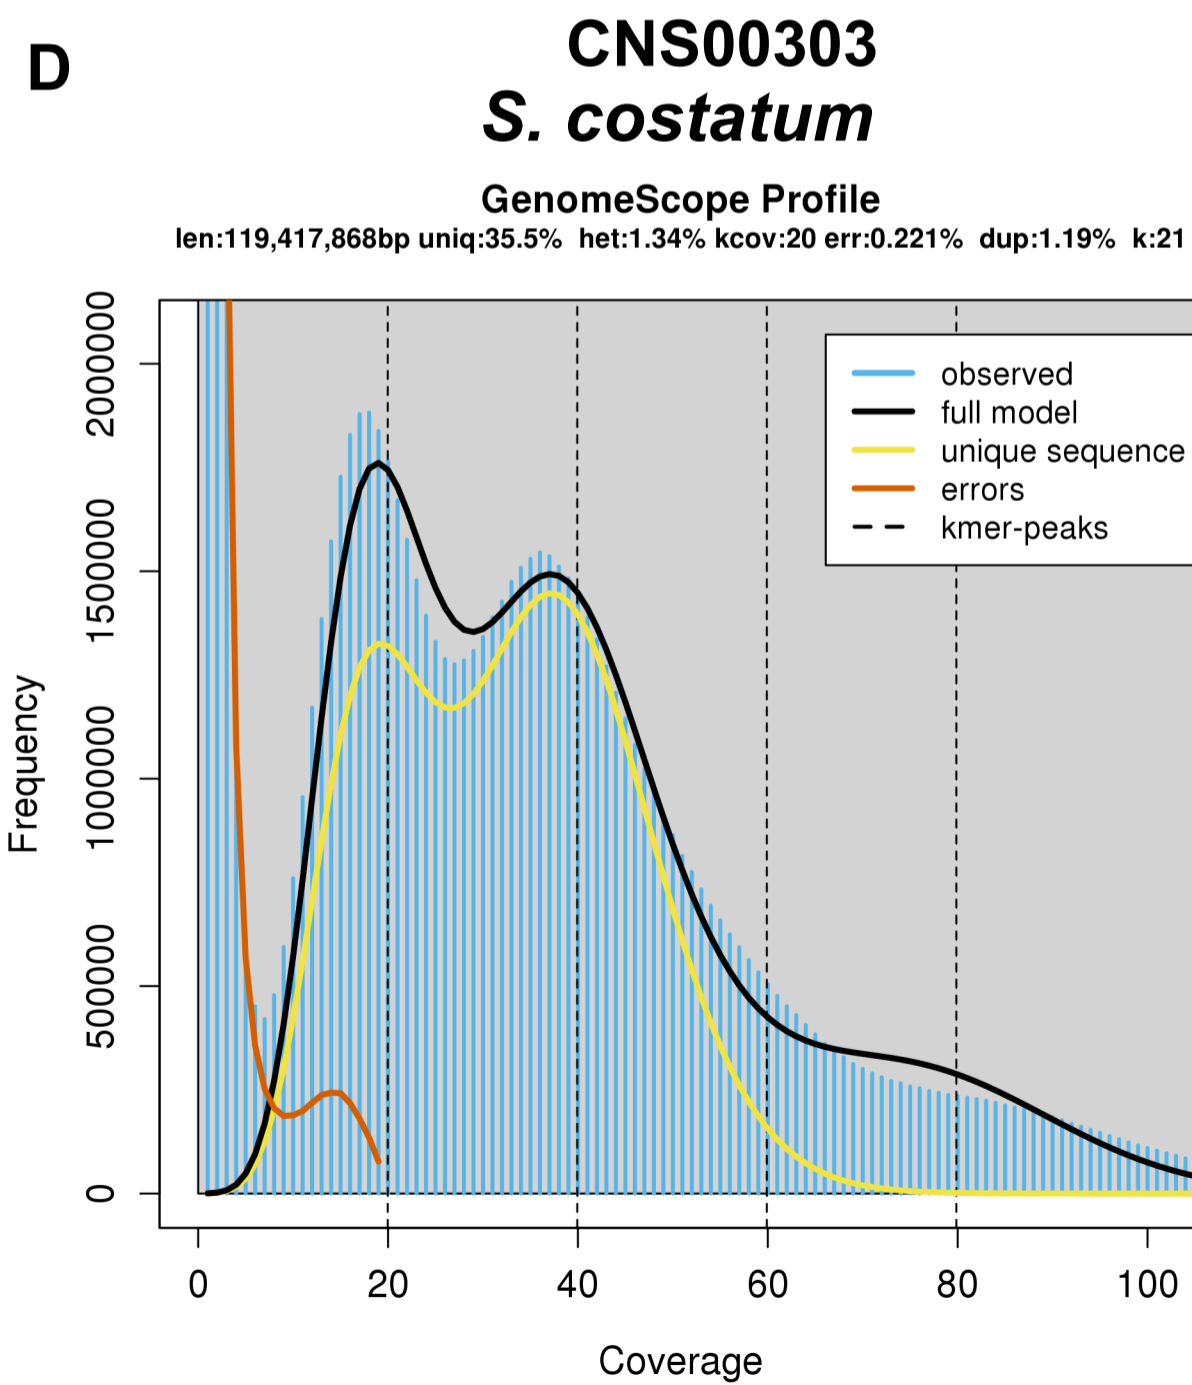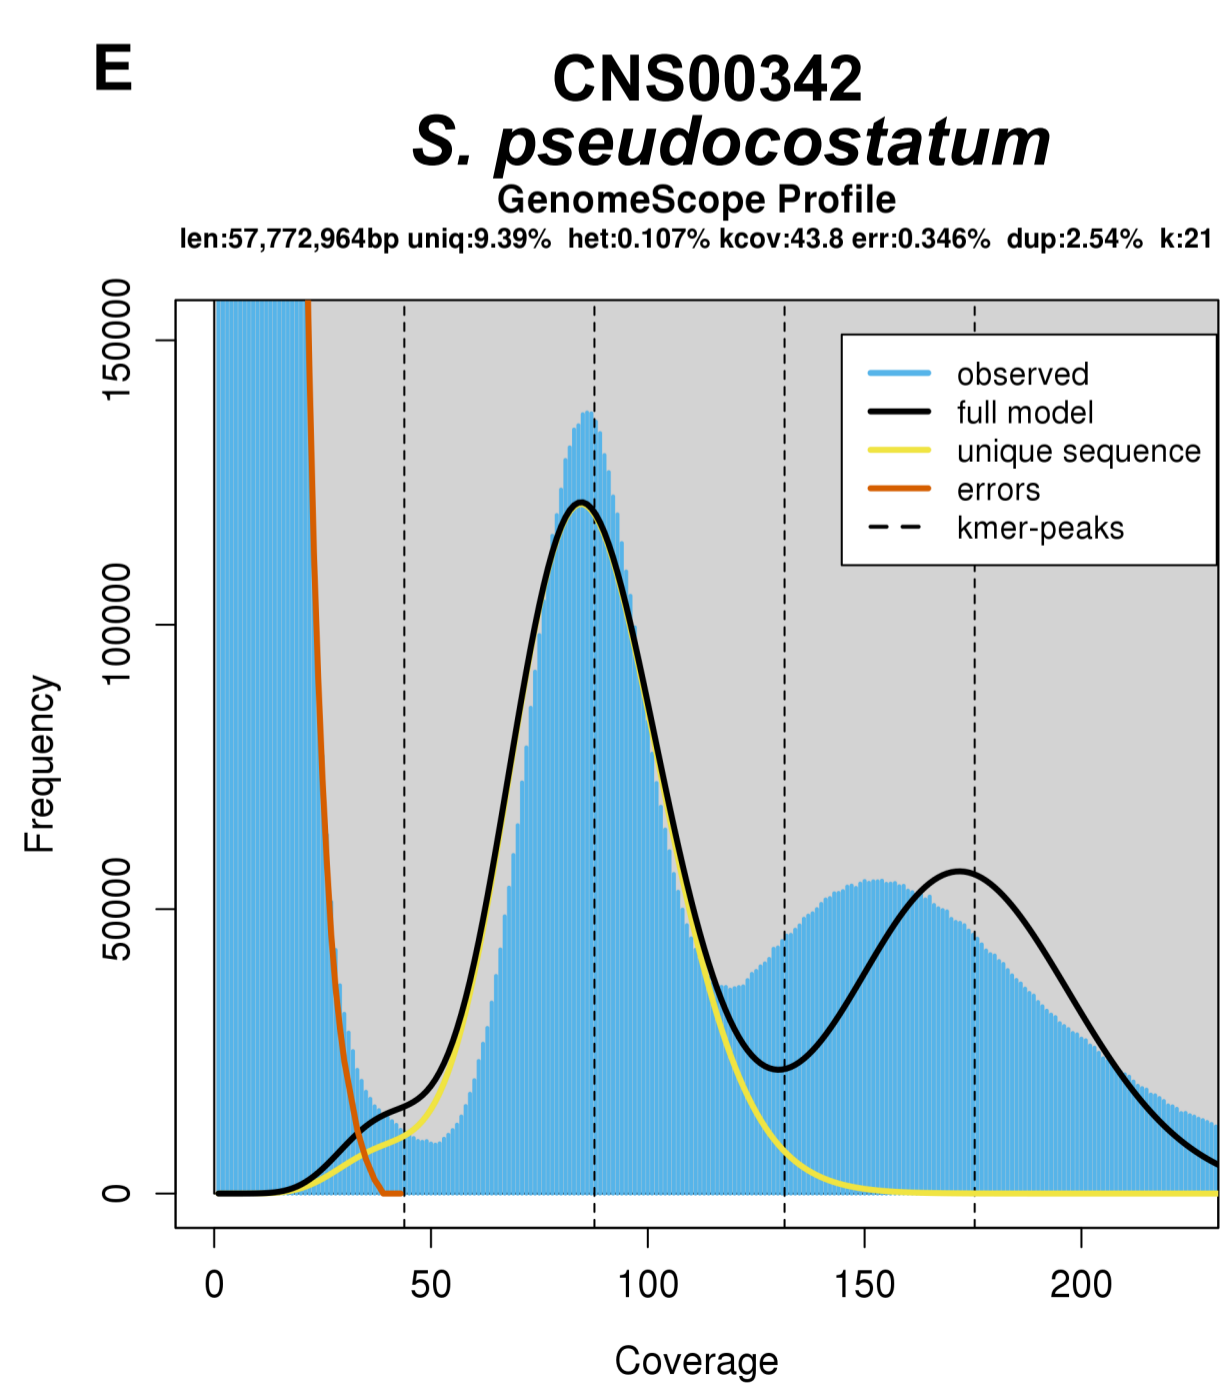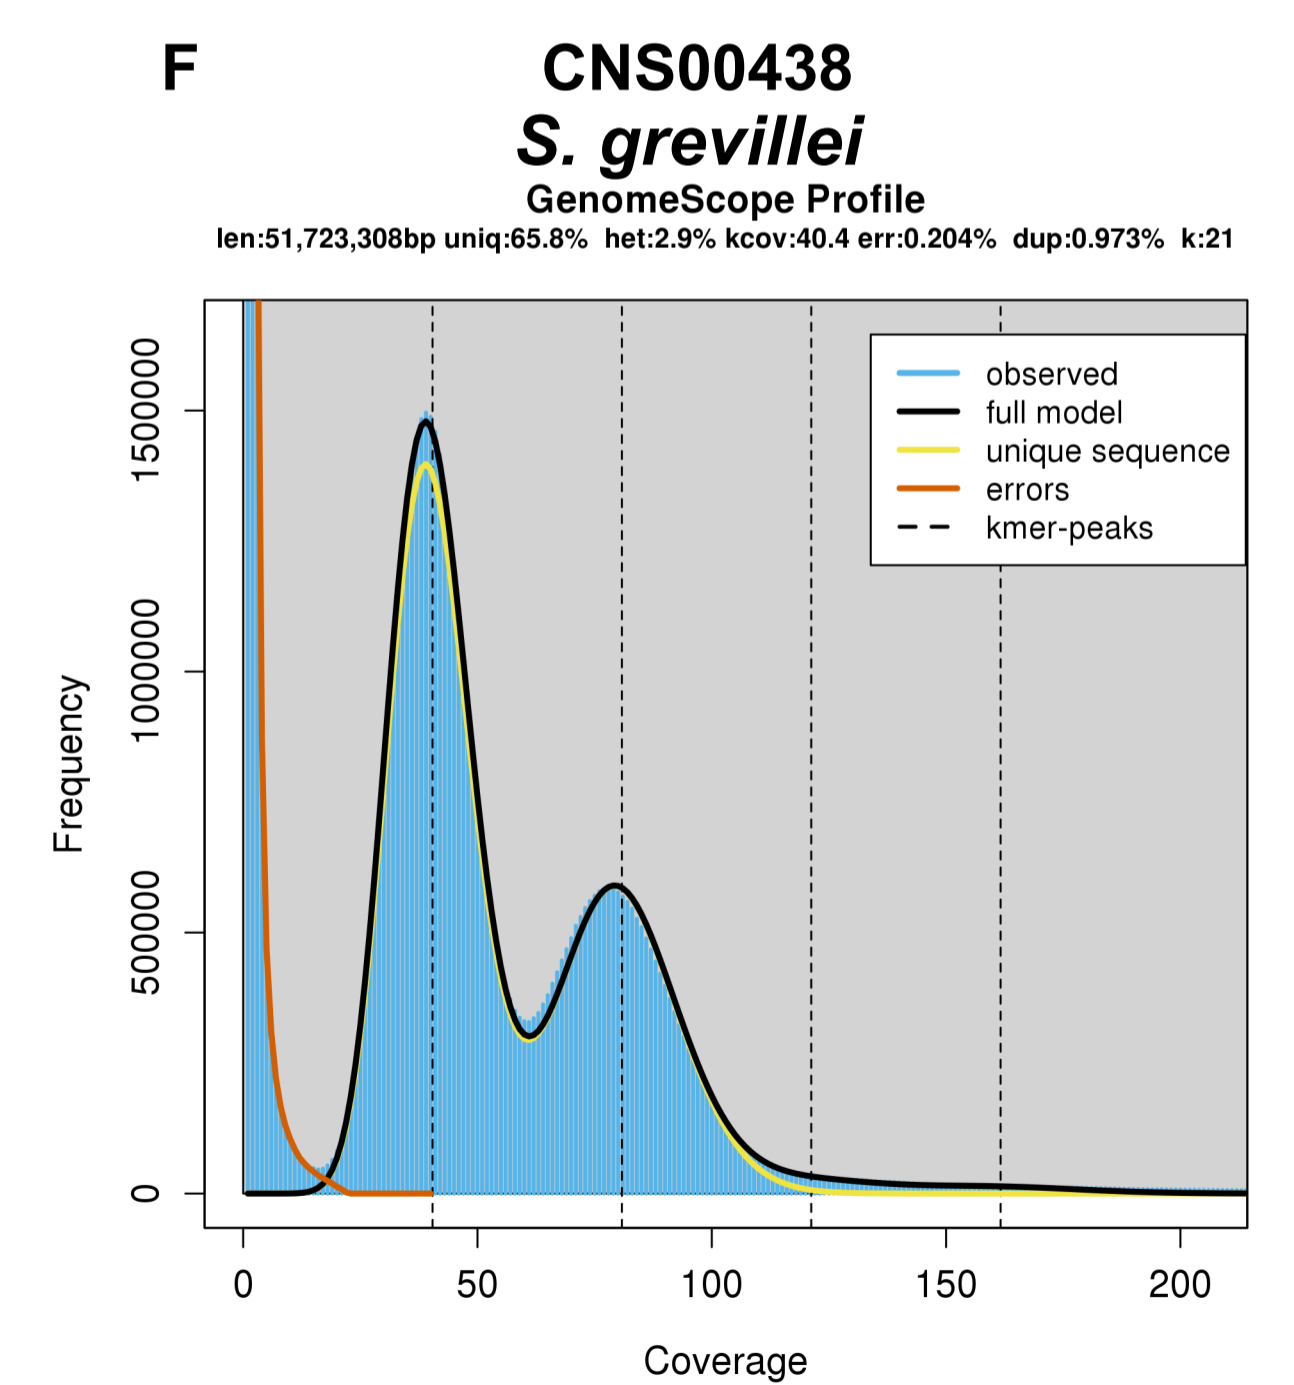

Supplement: 12864_2021_7999_MOESM12_ESM.pdf [file 12864_2021_7999_MOESM12_ESM.pdf]
